# Supplementary material for: Why are sec-alkylperoxyl bimolecular self-reactions orders of magnitude faster than the analogous reactions of tert-alkylperoxyls? The unanticipated role of CH hydrogen bond donation
Source: Royal Society of Chemistry journal article supplement (doi:10.1039/c6cp04670c), 2016-01-01
Supplement: c6cp04670c1.pdf [file c6cp04670c1.pdf]

# Why are *sec*-Alkylperoxyl Bimolecular Self-Reactions Orders of Magnitude Faster than the Analogous Reactions of *tert*-Alkylperoxyls? The Unanticipated Role of CH Hydrogen Bond Donation.

Richmond Lee,<sup>a</sup> Ganna Gryn'ova,<sup>a,†</sup> K. U. Ingold<sup>\*,b</sup> and Michelle L. Coote<sup>\*,a</sup>

<sup>a</sup>ARC Centre of Excellence for Electromaterials Science, Research School of Chemistry, Australian National University, Canberra ACT 2601, Australia

<sup>b</sup>National Research Council, 100 Sussex Drive, Ottawa, ON K1A 0R6, Canada

<sup>†</sup>Present address: Institut des Sciences et Ingénierie Chimiques, Ecole polytechnique fédérale de Lausanne, Lausanne, Switzerland

## Supporting Information

### *Table of Contents*

|                                                                            |    |
|----------------------------------------------------------------------------|----|
| Appendix S1. Background computational studies .....                        | 2  |
| Appendix S2. Non-bonded interactions: NCI and DORI Analyses .....          | 5  |
| Appendix S3. Assessment of Hydrogen Bonding Strength in Model Systems..... | 7  |
| Appendix S4. Additional Computational details .....                        | 8  |
| Appendix S4. Raw Computational Data .....                                  | 10 |
| Appendix S5. Gaussian archive entries .....                                | 11 |
| Appendix S6. References .....                                              | 29 |

## Appendix S1. Background computational studies

In pioneer accounts, Raley *et al.*<sup>1</sup> and Russell<sup>2</sup> suggested that ROO• is first involved in formation of the adduct tetraoxide RO<sub>4</sub>R that further trifurcates into three major reaction channels (Scheme S1, reactions 1a, 1c & 1d). Various experimental works exploring MeOO•<sup>3</sup> and EtOO•<sup>4</sup> self-reaction indicated that, based on relative rate coefficients, the more dominant pathways are 1a and 1d, with 1c being minor. The kinetic branching ratio of reactions 1a and 1d vary amongst the reports but, based on the observed products the secondary oxidation reaction of EtO• by O<sub>2</sub> quickly consumes it and forms aldehyde and HOO•.<sup>4a</sup>

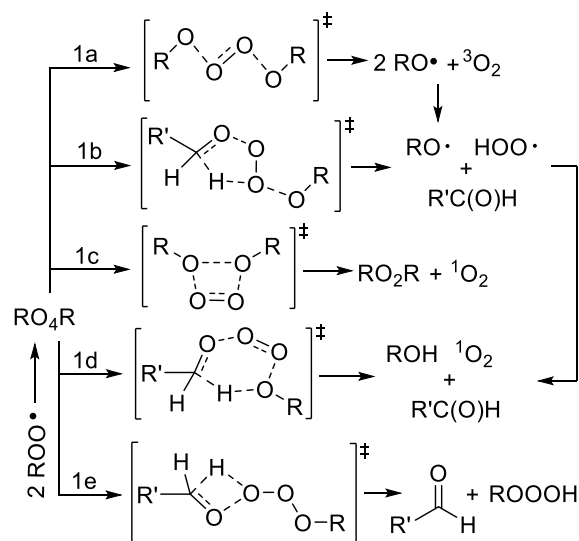

**Scheme S1.** Possible rearrangement pathways of tetraoxide.

Early computational studies investigated peroxy self-reaction and the associated reaction pathways for tetraoxide decomposition based on reaction energetics.<sup>5</sup> Notably, theoretical calculations on methyl peroxy self-reaction by Ghigo *et al* surmised that at the high temperatures associated with combustion (~900 K), most tetraoxide will dissociate to MeO• radicals and O<sub>2</sub>.<sup>6</sup> More recent density functional theory studies by the separate groups of F. Wang<sup>7</sup> and W. Wang<sup>8</sup> report a high activation barrier for the classic two-step-cyclic pathway as initially proposed by Russell and Raley (Scheme 1, reaction 1c & 1d)<sup>2</sup>. The lowest barrier calculated by Wang and co-workers involves a cyclic rearrangement of the alpha hydrogen dissociating to CH<sub>3</sub>C(O)H + HOO• + CH<sub>3</sub>CH<sub>2</sub>O• (Scheme 1, 1b). In this regard, an earlier MP2 study by Feria *et al*<sup>9</sup> found a similar pathway for the concerted rearrangement step 1b. However, while this previous computational work has evaluated pathways 1b-1e, it has not definitively explored other possible O-O bond type fission pathways, and in particular the homolysis of (CH<sub>3</sub>CH<sub>2</sub>OO)<sub>2</sub> to CH<sub>3</sub>CH<sub>2</sub>OOO• + CH<sub>3</sub>CH<sub>2</sub>O• and its further dissociation of CH<sub>3</sub>CH<sub>2</sub>OOO• to CH<sub>3</sub>CH<sub>2</sub>O• + O<sub>2</sub> (Scheme 1, reaction 1a). It is also possible that the products of this radical reaction (1a) undergo further self-reaction to give ROH + R'C(O)H + O<sub>2</sub>, hence providing an alternative route to the products of channels 1b and 1d.

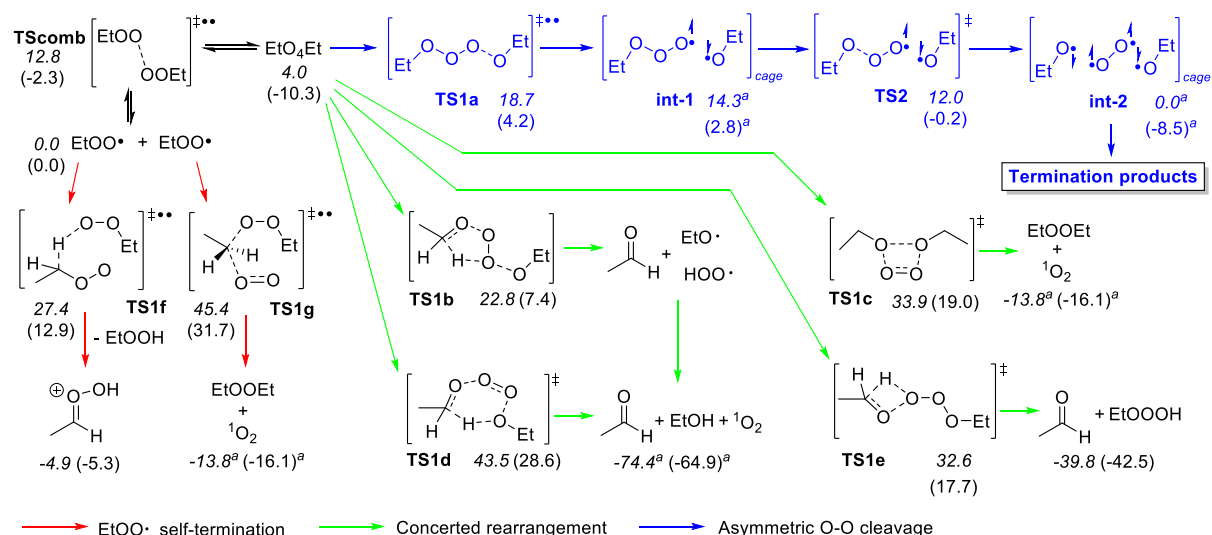

**Figure S1.** Reaction pathways describing the fate of  $\text{EtOO}^\bullet$  self-termination and tetroxide ( $\text{EtO}_4\text{Et}$ ) decomposition. Values in italics are free energy relative and in parenthesis are enthalpies (kcal/mol) relative to  $2 \text{EtOO}^\bullet$ . <sup>a</sup> Spin-projection corrected energies.

Figure S1 shows the calculated Gibbs free energy barriers and reaction energies for the possible decomposition pathways from diethyl tetroxide  $\text{EtO}_4\text{Et}$  at room temperature. It is formed from combination of the 2  $\text{EtOO}^\bullet$  through **TScomb** (Figure S1;  $\Delta G^\ddagger = 12.8$  kcal/mol). In addition to the formation of the  $\text{EtO}_4\text{Et}$  via combination of two peroxy radicals, we also considered alternative self-reaction channels.

The first is self-reaction of two peroxy radicals via H-abstraction, **TS1f** (Figure S1), to form  $\text{EtOOH}$  and a Criegee intermediate. We find that this pathway has a free energy barrier of 27.4 kcal/mol. The second via  $S_H2$  homolytic substitution (**TS1g**) between two peroxy radicals but this step is highly energetically costly with calculated free barrier of 45.4 kcal/mol. Based on energetics it is more likely that the self-reaction of peroxy radicals results in formation of the tetroxide, which then undergoes further decomposition.

Examining Figure S1, we first note that from  $\text{EtO}_4\text{Et}$ , there is an O-O bond rupture transition state (TS) structure (Figure S1 **TS1a**,  $\Delta G^\ddagger = 18.7$  kcal/mol). This corresponds to the single asymmetric homolytic O-O bond fragmentation experimentally observed by Brown<sup>10</sup> and Ingold<sup>11</sup> for di-*tert*-butyl tetroxide ( ${}^t\text{BuOOOO}{}^t\text{Bu}$ ). Nangia and Benson,<sup>12</sup> claimed that the corresponding intermediates  $\text{CH}_3\text{OOO}^\bullet + \text{CH}_3\text{O}^\bullet$  could not have been formed as the standard enthalpy of formation,  $\Delta H_f^\circ = 23.3$  kcal/mol, is well above the activation enthalpy of 17.5 kcal/mol. However our calculations suggest that the radical pair **int-1** ( $\Delta G = 14.3$  kcal/mol) is more exoergic than the preceding **TS1a**. It is thus more viable for caged radical species to be present in solution phase and stabilized by non-covalent H-bond interactions with the  $\alpha$ -hydrogen on R group in our context.

The subsequent O-O fission of **int-1** through transition state **TS2** connects to an caged radical complex **int-2** ( $\Delta G = 0.0$  kcal/mol) with overall singlet spin multiplicity,  ${}^3[\text{EtO}^\bullet]_2 \cdots {}^3\text{O}_2$ . Interestingly the relative Gibbs free energy for **TS2** is lower than the preceding **int-1**, which suggests that the second O-O fragmentation is a barrierless process, which would immediately follow the first O-O fragmentation. **TS2** was fully investigated by scanning the potential energy surface (PES) for

unimolecular dissociation of O<sub>2</sub> at coupled cluster CCSD/6-31G(d) level of theory. Due to computational constraints, trioxyl radical was probed instead ( $\text{EtOOO}\cdot \rightleftharpoons \text{EtO}\cdot + \text{O}_2$ ). From the PES a possible first order saddle-point structure was located just 1 kcal/mol above the minimum for which the process could be deemed diffusion controlled (Figure S2). We suspect that at a level of high correlation CCSD(T) approach to optimize the 2<sup>nd</sup> O-O fragmentation (**TS2**) would similarly yield a very low activation barrier.

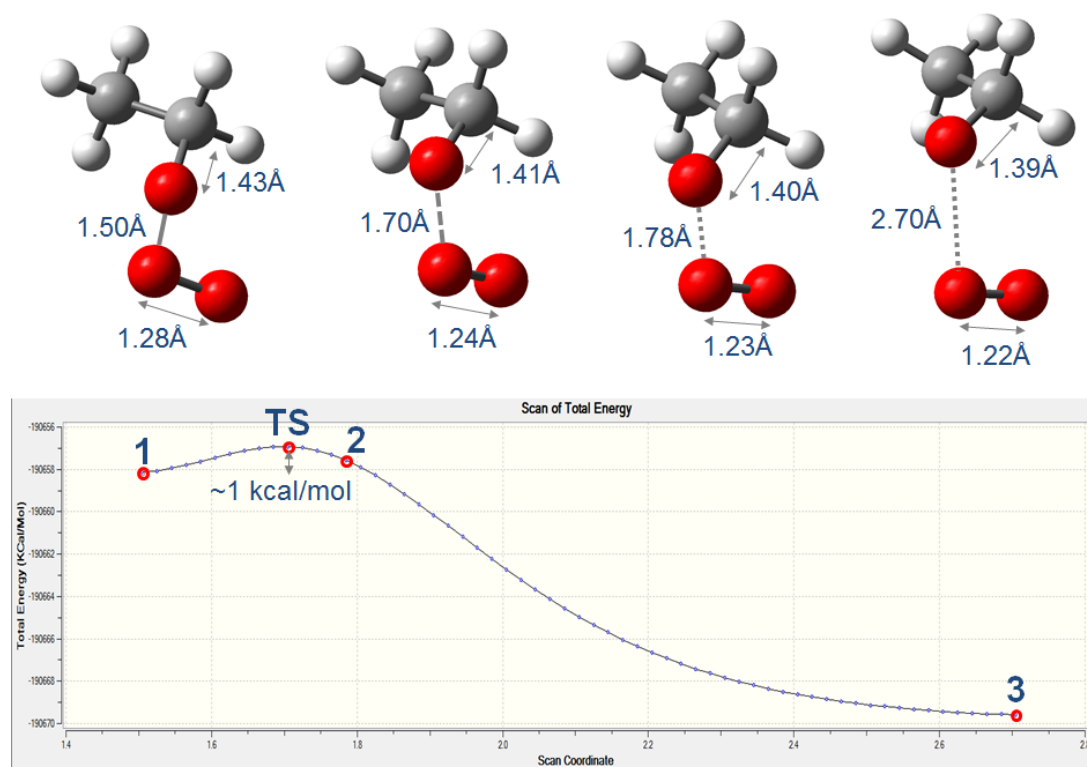

**Figure S2.** Potential energy scan of O<sub>2</sub> dissociation from EtOOO• at CCSD/6-31(d) level of theory.

The two-step O-O fragmentation process via **TS1a** is the most energetically accessible amongst the other concerted rearrangement processes that were previously studied (**TS1b-e** in Figure S1 corresponding to literature pathways 1b-1e in Scheme S1).<sup>7-8</sup> What is noteworthy is that the putative Russell cyclic concerted mechanism (**TS1d**, Figure S1; pathway 1d in Scheme S1) is highly unfavorable with a free energy barrier  $\Delta G^\ddagger$  of 42.8 kcal/mol! This is presumably due to a combination of the high intrinsic barrier of C-H bond breaking, and strain in the transition state. Similarly, for pathway 1c (**TS1c**) which produces dialkyl peroxide, the high free energy barrier of 33.9 kcal/mol is due to highly strained O arrangement in the cyclic transition state. Indeed, all of the concerted mechanisms considered (**TS1b-e**), strained O-O-O-O cyclic rearrangement in the transition state resulted in higher free energy barriers than the asymmetric step-wise **TS1a**.

The 3-component radical complex **int-2** formed directly from **TS1a** can then undergo further decomposition or termination to non-radical products, or cage escape, the outcome of which depends on whether the precursor alkylperoxyl radical contains  $\alpha$ -hydrogen – for which all of decomposition termination pathways were covered for *n*-, *s*- and *t*-butylperoxyl radicals in the main manuscript. As we show in the main manuscript, this single pathway and the subsequent decomposition of **int-2** can account for all of the different experimental products, without recourse to **TS1b-e**.

## Appendix S2. Non-bonded interactions: NCI and DORI Analyses

Non-covalent interaction (NCI) analysis is used to identify weak bonding (H-bonding or Van der Waals) and non-bonding interactions (steric repulsion) between molecular fragments based on the electron density and its derivatives. The NCI topological analysis based on the reduced density gradient was computed with NCIPLOT programme<sup>13, 15</sup> to qualify isosurfaces or 3D plots of non-covalent interactions in the electronic structure of **TS1a**. Regions which are attractive have sign of the second density Hessian eigenvalue,  $\text{sign}(\lambda_2)$ , as negative and repulsive as positive. For Van der Waals interaction,  $\lambda_2 \lesssim 0$ . The NCI provides a more quantitative picture of the non-covalent interactions or steric repulsions in the **TS1a** analogues (Fig. S3).

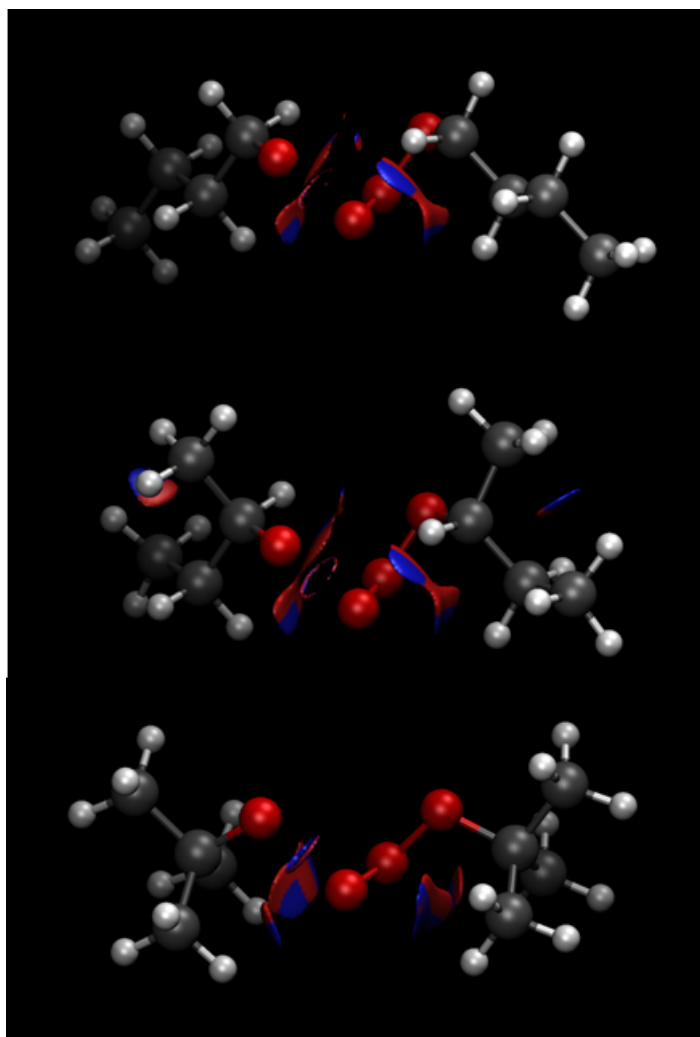

**Figure S3.** Non-covalent interaction (NCI) analysis is used to identify weak bonding (H-bonding and Van der Waals) and non-bonding interactions (steric repulsion) between molecular fragments based on electron density and its derivatives. Shown here are 3D plots of the interaction regions between the various fragments in **TS1a** for primary, secondary and tertiary tetroxides respectively. Blue indicates an attractive interaction, red indicates repulsion. The electron density  $\rho(r)$  is set at an isovalue of 0.5 au in the  $\text{sign}(\lambda_2)\rho(r)$  range of -0.5 to 0.5, which corresponds to blue-green-red color scale. Graphics were generated from VMD<sup>14</sup>. For full information on NCI see the text.

The NCI plot reveals  $\text{C}_\alpha\text{-H}\cdots\text{O}$  and  $\text{C}_\beta\text{-H}\cdots\text{O}$  H-bonding interactions for primary and secondary **TS1a**, while tertiary exhibits only  $\text{C}_\beta\text{-H}\cdots\text{O}$  interactions. To further quantify the overall strength of non-

covalent interactions for the isomers, we have employed an orbital-free density-dependent scalar field and performed the Density Overlap Regions Indicator (DORI) analyses<sup>16</sup> using the modified DGrid program<sup>17</sup> (see Figures S4 and S5). All densities were computed with ADF package<sup>18</sup> at the PBE0-dDsC/DZP<sup>19</sup> level of theory. DORI detects the regions of electron density overlap and allows discriminating between the covalent and non-covalent interactions, associated with these regions. The DORI compactness index is a dimensionless quantity that characterizes the electron compactness within a given density overlap region. It is computed as an integral of electron density over the chosen region (domain), enclosed by DORI isosurface at a chosen isovalue (in this work set to 0.95).

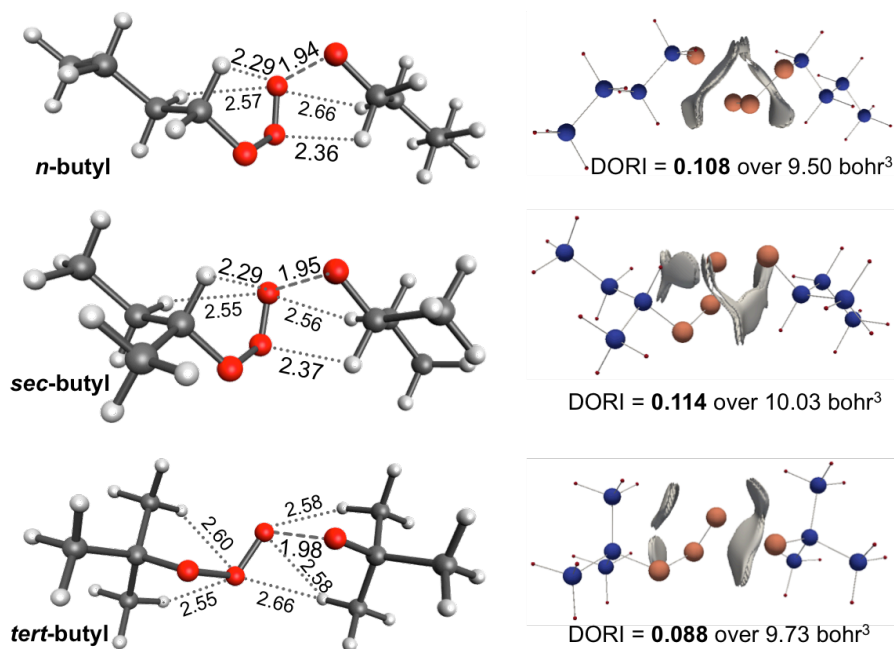

**Figure S4.** Optimized transition state structures **TS1a** isomers (left) showing key  $C_{\alpha}$ -H $\cdots$ O and  $C_{\beta}$ -H $\cdots$ O H-bonding interactions. Cumulative Density Overlap Regions Indicator (DORI) compactness indices quantify the strength of non-covalent interactions, corresponding to the electron density overlap regions, enclosed by DORI isosurfaces at 0.95 isovalue (right).

## Appendix S3. Assessment of Hydrogen Bonding Strength in Model Systems

To assess the energetic importance of hydrogen bond formation, we calculated the energy for formation of hydrogen-bonded complexes between *s*- and *t*-dibutyl tetroxides and  $\text{CH}_3\text{OCH}_3$  (see Figure S5). The zero-point corrected complexation energies were calculated at M11/6-311++G(d,p)//M11/6-31+G(d,p) level of theory, and the stabilization energies are 5.7 and 4.2 kcal mol<sup>-1</sup> for secondary and tertiary alkyl respectively. This suggests that, provided contacts are close enough, C–H···O hydrogen bonding interactions are energetically significant. Moreover, the extra stabilization of 1.5 kcal mol<sup>-1</sup> calculated in the *s*-tetroxide-ether complex could be attributed to stronger C<sub>α</sub>-H···O bonding interactions as also indicated by the larger DORI compactness indices (Figure S5, right).

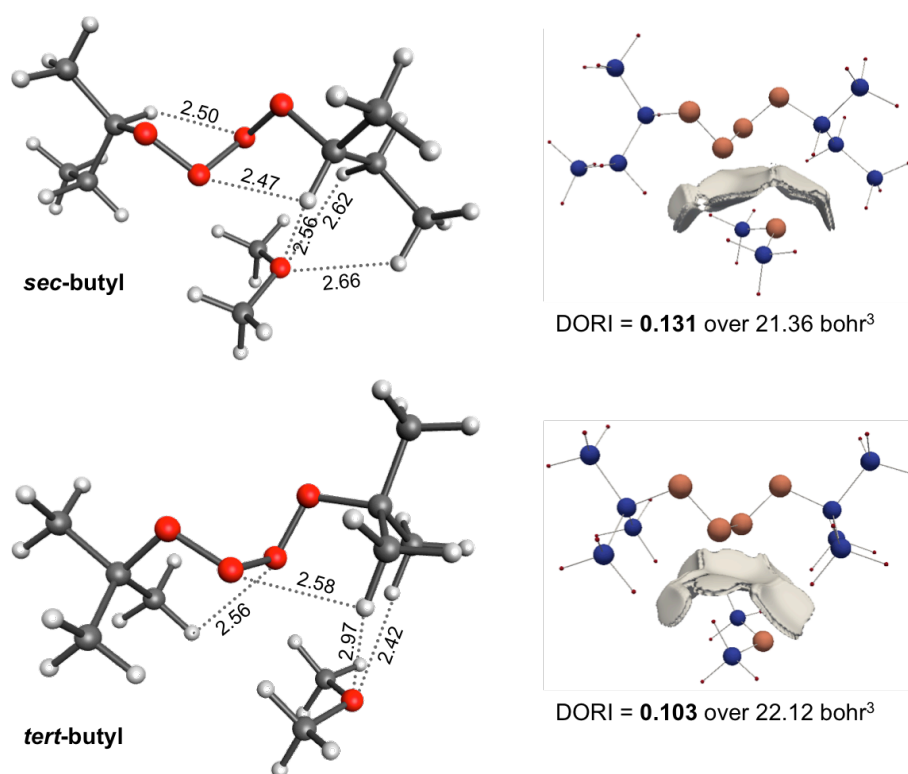

**Figure S5.** Geometries of the tetroxide-ether complexes, showing bond distances (Å) of key H-bonds. Cumulative DORI compactness indices quantify the strength of non-covalent interactions, corresponding to the electron density overlap regions, enclosed by DORI isosurfaces at 0.95 isovalue (right)

## Appendix S4. Additional Computational details

Density functional theory (DFT) and ab initio calculations were carried out with Gaussian 09<sup>20</sup> suite of programs. A survey of DFT methods was carried out to select an appropriate functional. We selected the Minnesota meta hybrid functional M11 (an improved version of the Minnesota 06 functional series)<sup>21</sup> with Pople's basis set 6-31+G(d,p)<sup>22</sup> on the basis that it provided values of the bond dissociation enthalpy (BDE) of peroxides that were close to literature values from both experiment and high-level ab initio levels of theory (Table S1).

**Table S1.** O-O bond dissociation enthalpies (kcal/mol) for peroxides

|        | Calculated | BDE from literature <sup>a</sup> |
|--------|------------|----------------------------------|
| HOOH   | 49.8       | 50.7 (50.5)                      |
| MeOOH  | 43.6       | 44.7 (44.6)                      |
| MeOOME | 36.3       | 38.5 (37.8)                      |

<sup>a</sup> Ab initio BDE at CBSQ level of theory and in parenthesis are experimental values (see ref.<sup>23</sup> for related citation)

Geometries were optimized at the prescribed M11/6-31+G(d,p) and second derivative eigenvalues were inspected to ensure that the convergence corresponds correctly to a minima (all positive) or first-order saddle point (one negative). The keyword 'guess=mix' and open-shell M11 (UDFT) were implemented to optimize singlet bi- or tetra-radicaloid structures, and the spin-squared operator  $\langle S^2 \rangle$  was confirmed to be approximately equal to 1 or 2 respectively (see table S2).

Improved single point calculations using open-shell coupled cluster UCCSD(T) with Dunning's correlation consistent double zeta cc-pVDZ<sup>24</sup> basis set was carried out on the optimized geometries. The wavefunctions from the UDFT output checkpoint files were used as initial guesses for UCCSD(T) computations by evoking 'guess=read' keyword. The  $T_1$  diagnostic was calculated concurrently to ascertain if the single-reference UCCSD(T) wavefunction is reliable. It has been reported that values above the 'benchmark' 0.044 should be treated with multi-reference methods<sup>25</sup>; in the present work all species fall below this threshold (Table S2). The UCCSD(T) electronic energies were combined with M11/6-31+G(d,p) thermal and vibrational correction energies to obtain the gas phase free energy  $G_{\text{gas}}$  at ambient 298 K (table S2). The vibrational corrections were treated by means of quasiharmonic approximation in which frequencies below 100  $\text{cm}^{-1}$  are set to 100  $\text{cm}^{-1}$  to minimize erroneous vibrational entropies.<sup>26</sup>

$$k = \frac{k_B T}{h} \exp \left( -\frac{G}{RT} \right)$$

For equilibrium structures, the spin-projection method for the broken symmetry minimum structures was adapted in our computations to minimize triplet contamination in the open-shell UCCSD(T) electronic energies. It is noteworthy that we do not see significant differences in the electronic energy (within 1 kcal/mol) between the spin-projection corrected  $E_{\text{AP}}[\text{UCCSD(T)}]$  and broken symmetry  $E_{\text{BS}}[\text{UCCSD(T)}]$ ; except in the case of the relative energies between the lowest state excited singlet state of  $\text{O}_2$  and the ground state triplet. The spin-projection method however severely under-estimates the TS energies such that the first **TS1a** is negative and not meaningful. This under-estimation was also encountered in the work of Bach *et al.*<sup>27</sup> Previous calculations by Schegel<sup>28</sup> and Truhlar<sup>29</sup> demonstrated that UCCSD(T) calculations are less susceptible to spin contamination or unrestricted reference state and this prompts us to consider all UCCSD(T) TSs



energies as is without spin correction. The singlet spin-projected energy is estimated from equations (1) and (2) based on Yamaguchi's technique:

$$E_{AP} = E_{BS} + (1 - \alpha)E_{HS} \quad (1)$$

$$= \frac{{}^{HS}\langle S^2 \rangle \langle S^2 \rangle^{LS}}{{}^{HS}\langle S^2 \rangle \frac{{}^{BS}\langle S^2 \rangle^{exact}}{\alpha}} \quad (2)$$

## Appendix S4. Raw Computational Data

| Molecules                       | E <sub>ns</sub> [CCSD(T)] <sup>a</sup> | E <sub>as</sub> [CCSD(T)] <sup>b</sup> | E <sub>AP</sub> [CCSD(T)] <sup>c</sup> | $\langle S^2 \rangle$ <sup>d</sup> | G <sub>corr</sub> (298K) <sup>e</sup> | H <sub>corr</sub> (298K) <sup>e</sup> | ZPE 298K <sup>e</sup> | G(298K)     | H(298K)      | E + ZPE (298K) | T1 <sup>f</sup> |
|---------------------------------|----------------------------------------|----------------------------------------|----------------------------------------|------------------------------------|---------------------------------------|---------------------------------------|-----------------------|-------------|--------------|----------------|-----------------|
| O2s                             | -149.9852842                           | -149.969762                            | -149.9531284*                          | 1.03673                            | -0.01559322                           | 0.00826876                            | 0.004228              | -149.968722 | -149.9448597 | -149.948901    | 0.01216174      |
| O2t                             | -                                      | -                                      | -149.9852842                           | 2.004191                           | -0.01661311                           | 0.00828487                            | 0.004244              | -150.001897 | -149.9769993 | -149.98104     | 0.01282452      |
| EtOH                            | -                                      | -                                      | -154.6233245                           | -                                  | 0.05464737                            | 0.08523404                            | 0.080013              | -154.568677 | -154.5380905 | -154.543311    | 0.00788209      |
| aldehyde                        | -                                      | -                                      | -153.4269649                           | -                                  | 0.0309025                             | 0.05947527                            | 0.055262              | -153.396062 | -153.3674896 | -153.371703    | 0.01487743      |
| EtOOEt                          | -                                      | -                                      | -307.9768611                           | -                                  | 0.10883818                            | 0.14910337                            | 0.140167              | -307.868023 | -307.827577  | -307.836694    | 0.01013461      |
| EtOOOH                          | -                                      | -                                      | -304.5400048                           | -                                  | 0.05783919                            | 0.09285821                            | 0.08652               | -304.482166 | -304.4471466 | -304.453485    | 0.01086824      |
| crlegee                         | -                                      | -                                      | -228.3266967                           | -                                  | 0.0329059                             | 0.06530965                            | 0.059638              | -228.293791 | -228.2613871 | -228.267058    | 0.04074263      |
| EtOOH                           | -                                      | -                                      | -229.5840992                           | -                                  | 0.05525718                            | 0.09009452                            | 0.083458              | -229.528842 | -229.4940047 | -229.500642    | 0.00982835      |
| EtO <sup>o</sup> *              | -                                      | -                                      | -228.9512033                           | 0.751286                           | 0.04378758                            | 0.07771484                            | 0.071799              | -228.907416 | -228.8734885 | -228.879404    | 0.02334087      |
| EtO*                            | -                                      | -                                      | -153.9579136                           | 0.7515                             | 0.03913212                            | 0.07019087                            | 0.06504               | -153.918781 | -153.8877227 | -153.892874    | 0.0144107       |
| TScomb                          | -                                      | -                                      | -457.9064424                           | 0.812751                           | 0.11200814                            | 0.15584157                            | 0.145983              | -457.794434 | -457.7506008 | -457.76046     | 0.03420275      |
| EtO4Et                          | -                                      | -                                      | -457.9215784                           | -                                  | 0.1131511                             | 0.15816099                            | 0.147544              | -457.808427 | -457.7634174 | -457.774034    | 0.01496069      |
| Ts1a                            | -                                      | -                                      | -457.8942969                           | 2.01389                            | 0.10938282                            | 0.15409014                            | 0.14395               | -457.784914 | -457.7402068 | -457.750347    | 0.03218104      |
| int-1                           | -457.8948822                           | -457.896032                            | -457.8972271*                          | 2.052365                           | 0.10523103                            | 0.15476472                            | 0.142483              | -457.791996 | -457.7424624 | -457.754745    | 0.02887123      |
| Ts2                             | -                                      | -                                      | -457.8990063                           | 6.08679                            | 0.10335258                            | 0.15171943                            | 0.140135              | -457.795654 | -457.7472869 | -457.758872    | 0.03373498      |
| int-2                           | -457.9105204                           | -457.9118459                           | -457.9295369*                          | 6.008892                           | 0.09764839                            | 0.15192381                            | 0.137832              | -457.831889 | -457.7605843 | -457.791704    | 0.0160777       |
| Ts1b                            | -                                      | -                                      | -457.8862262                           | -                                  | 0.1076565                             | 0.15110171                            | 0.141358              | -457.77857  | -457.7351245 | -457.744868    | 0.0238621       |
| Ts1c                            | -                                      | -                                      | -457.8702398                           | -                                  | 0.10940065                            | 0.15351723                            | 0.143515              | -457.760839 | -457.7167226 | -457.726725    | 0.02774917      |
| Ts1d                            | -                                      | -                                      | -457.851446                            | -                                  | 0.10589383                            | 0.15004366                            | 0.140015              | -457.745552 | -457.7014023 | -457.711431    | 0.02470454      |
| Ts1e                            | -                                      | -                                      | -457.8695338                           | -                                  | 0.10672919                            | 0.15083549                            | 0.140985              | -457.762805 | -457.7186983 | -457.728549    | 0.02063866      |
| Ts1f                            | -                                      | -                                      | -457.876745                            | 0.981751                           | 0.10528901                            | 0.15028501                            | 0.139995              | -457.77115  | -457.726456  | -457.73675     | 0.03194881      |
| Ts1g                            | -                                      | -                                      | -457.8500133                           | 1.374228                           | 0.10613305                            | 0.15357244                            | 0.14238174            | -457.743880 | -457.6964409 | -457.7076316   | 0.03860916      |
| <b>n-Butyl</b>                  |                                        |                                        |                                        |                                    |                                       |                                       |                       |             |              |                |                 |
| ROH                             | -                                      | -                                      | -233.0200342                           | -                                  | 0.106475                              | 0.14460859                            | 0.136727              | -232.914    | -232.875426  | -232.883307    | 0.00761948      |
| aldehyde                        | -                                      | -                                      | -231.8250713                           | -                                  | 0.083162                              | 0.12013457                            | 0.112871              | -231.742    | -231.704937  | -231.7122      | 0.01230833      |
| aldehyde* ( <sup>3</sup> T)     | -                                      | -                                      | -231.7038231                           | 2.00135                            | 0.078831                              | 0.1172781                             | 0.109744              | -231.625    | -231.586545  | -231.59408     | 0.01789196      |
| ROOR                            | -                                      | -                                      | -464.7704588                           | -                                  | 0.213838                              | 0.2681104                             | 0.253841              | -464.557    | -464.502348  | -464.516618    | 0.00914624      |
| RO*                             | -                                      | -                                      | -232.354807                            | 0.751508                           | 0.091378                              | 0.12969523                            | 0.122021              | -232.263    | -232.225112  | -232.232786    | 0.01225714      |
| ROO*                            | -                                      | -                                      | -307.349157                            | 0.751472                           | 0.096563                              | 0.13731207                            | 0.128932              | -307.253    | -307.211845  | -307.220225    | 0.01996798      |
| TScomb                          | -                                      | -                                      | -614.7013189                           | 0.814481                           | 0.217673                              | 0.27482076                            | 0.259632              | -614.484    | -614.426498  | -614.441687    | 0.02821251      |
| RO4R                            | -                                      | -                                      | -614.7157274                           | -                                  | 0.218768                              | 0.27717956                            | 0.26136               | -614.497    | -614.438548  | -614.454368    | 0.01303821      |
| Ts1a                            | -                                      | -                                      | -614.6890655                           | 0.870138                           | 0.215355                              | 0.27302884                            | 0.257673              | -614.474    | -614.416037  | -614.431393    | 0.02705711      |
| int-1                           | -614.689587                            | -614.6908211                           | -614.6914447                           | 1.049123                           | 0.212377                              | 0.27379928                            | 0.25653               | -614.479    | -614.417645  | -614.434915    | 0.02441950      |
| Ts2                             | -                                      | -                                      | -614.6922258                           | 1.953559                           | 0.209565                              | 0.27047194                            | 0.253735              | -614.488    | -614.426754  | -614.443491    | 0.01626112      |
| int-2                           | -614.7046466                           | -614.7060834                           | -614.7068019                           | 2.003205                           | 0.204594                              | 0.2708279                             | 0.251694              | -614.502    | -614.435974  | -614.455108    | 0.01379387      |
| int-2* ( <sup>3</sup> T)        | -614.7046466                           | -614.7065344                           | -614.7084195                           | 3.002293                           | 0.203686                              | 0.27057688                            | 0.251612              | -614.505    | -614.437843  | -614.456808    | 0.01479401      |
| <sup>3</sup> [RO•] <sub>2</sub> | -                                      | -                                      | -464.7187116                           | 2.003197                           | 0.203208                              | 0.2616284                             | 0.246014              | -464.516    | -464.457083  | -464.472697    | 0.01304605      |
| TS-H                            | -                                      | -                                      | -464.706201                            | 2.008062                           | 0.202765                              | 0.25731423                            | 0.24352               | -464.503    | -464.448887  | -464.462681    | 0.01818879      |
| <b>sec-Butyl</b>                |                                        |                                        |                                        |                                    |                                       |                                       |                       |             |              |                |                 |
| ROH                             | -                                      | -                                      | -233.0258754                           | -                                  | 0.106595                              | 0.14399517                            | 0.136274              | -232.919    | -232.88188   | -232.889602    | 0.00807350      |
| ketone                          | -                                      | -                                      | -231.8344048                           | -                                  | 0.083256                              | 0.11993284                            | 0.112767              | -231.751    | -231.714472  | -231.721735    | 0.01253412      |
| ketone* ( <sup>3</sup> T)       | -                                      | -                                      | -231.7093322                           | 2.001635                           | 0.079366                              | 0.11759853                            | 0.110044              | -231.63     | -231.591734  | -231.599288    | 0.01829034      |
| ROOR                            | -                                      | -                                      | -464.7855312                           | -                                  | 0.214289                              | 0.26656634                            | 0.252643              | -464.571    | -464.518965  | -464.532888    | 0.00982059      |
| RO*                             | -                                      | -                                      | -232.3588035                           | 0.751553                           | 0.092267                              | 0.12983953                            | 0.122413              | -232.267    | -232.228964  | -232.23639     | 0.01306742      |
| ROO*                            | -                                      | -                                      | -307.3546254                           | 0.751499                           | 0.096292                              | 0.13667463                            | 0.128254              | -307.258    | -307.217951  | -307.226371    | 0.02013205      |
| TScomb                          | -                                      | -                                      | -614.7142074                           | 0.811448                           | 0.217406                              | 0.2736271                             | 0.258363              | -614.497    | -614.44058   | -614.455845    | 0.02883909      |
| RO4R                            | -                                      | -                                      | -614.7265746                           | -                                  | 0.218145                              | 0.27604963                            | 0.260051              | -614.508    | -614.450525  | -614.466524    | 0.01317509      |
| Ts1a                            | -                                      | -                                      | -614.6981565                           | 0.871145                           | 0.215397                              | 0.27225395                            | 0.25674               | -614.483    | -614.425903  | -614.441416    | 0.02669736      |
| int-1                           | -614.7004308                           | -614.7007149                           | -614.7007992                           | 1.030846                           | 0.212089                              | 0.2735262                             | 0.255999              | -614.489    | -614.427273  | -614.4448      | 0.02309531      |
| Ts2                             | -                                      | -                                      | -614.7142074                           | 1.757505                           | 0.209845                              | 0.27013325                            | 0.253284              | -614.504    | -614.444074  | -614.460924    | 0.02848704      |
| int-2                           | -614.7144209                           | -614.7164387                           | -614.717446                            | 2.000908                           | 0.205187                              | 0.27131403                            | 0.251999              | -614.512    | -614.446132  | -614.465447    | 0.01434901      |
| int-2* ( <sup>3</sup> T)        | -614.7144209                           | -614.7163571                           | -614.7182941                           | 3.00513                            | 0.204177                              | 0.27147981                            | 0.252189              | -614.514    | -614.446814  | -614.466105    | 0.01457738      |
| <sup>3</sup> [RO•] <sub>2</sub> | -                                      | -                                      | -464.7267998                           | 2.003216                           | 0.204593                              | 0.26269438                            | 0.247128              | -464.522    | -464.464105  | -464.479672    | 0.01384900      |
| TS-H                            | -                                      | -                                      | -464.717116                            | 2.007529                           | 0.202836                              | 0.25701827                            | 0.24299               | -464.514    | -464.460098  | -464.474126    | 0.01868998      |
| <b>tert-Butyl</b>               |                                        |                                        |                                        |                                    |                                       |                                       |                       |             |              |                |                 |
| RO*                             | -                                      | -                                      | -232.3650909                           | 0.751435                           | 0.09242                               | 0.12945504                            | 0.121967              | -232.273    | -232.235636  | -232.243124    | 0.01311434      |
| ROO*                            | -                                      | -                                      | -307.3617964                           | 0.751538                           | 0.095939                              | 0.13553544                            | 0.127123              | -307.266    | -307.226261  | -307.234674    | 0.02036880      |
| ROOR                            | -                                      | -                                      | -464.7955732                           | -                                  | 0.212664                              | 0.264524                              | 0.250436              | -464.583    | -464.531049  | -464.545137    | 0.00997469      |
| TScomb                          | -                                      | -                                      | -614.7254592                           | 0.807522                           | 0.217305                              | 0.27132298                            | 0.25627               | -614.508    | -614.454136  | -614.469189    | 0.02883463      |
| RO4R                            | -                                      | -                                      | -614.7376266                           | -                                  | 0.218401                              | 0.27372895                            | 0.257861              | -614.519    | -614.463898  | -614.479765    | 0.01328268      |
| Ts1a                            | -                                      | -                                      | -614.7064225                           | 0.886257                           | 0.2139                                | 0.27001909                            | 0.254395              | -614.493    | -614.436403  | -614.452027    | 0.02338280      |
| int-1                           | -614.7047458                           | -614.7057247                           | -614.7067161                           | 1.006697                           | 0.210647                              | 0.27134801                            | 0.253803              | -614.496    | -614.435368  | -614.452913    | 0.02044604      |
| Ts2                             | -                                      | -                                      | -614.7114693                           | 1.76101                            | 0.209002                              | 0.26876511                            | 0.251695              | -614.502    | -614.442705  | -614.459774    | 0.02762742      |
| int-2                           | -614.7241714                           | -614.7246844                           | -614.7249412                           | 2.004076                           | 0.204597                              | 0.26997119                            | 0.250668              | -614.52     | -614.45497   | -614.474273    | 0.01406218      |
| int-2* ( <sup>3</sup> T)        | -614.7241714                           | -614.724989                            | -614.728065                            | 3.004036                           | 0.204597                              | 0.26997119                            | 0.250668              | -614.521    | -614.455835  | -614.475138    | 0.01431414      |

All energies in hartrees. Single-point CCSD(T)/cc-pVDZ gas-phase electronic energy: <sup>a</sup> high spin UCCSD(T) electronic energies; <sup>b</sup> broken symmetry UCCSD(T) electronic energies & <sup>c</sup> spin-projected or closed shell CCSD(T) electronic energies. <sup>d</sup> Spin-squared operator of the CCSD(T) calculation. <sup>e</sup> T<sub>1</sub> diagnostic. <sup>f</sup> at M11 level of theory

## Appendix S5. Gaussian archive entries

**1O<sub>2</sub>**

```
1\1\GINC-R43\FOpt\UM11\6-31+G(d,p)\O2\ROOT\03-Sep-2015\0\#\ um11/6-31+
G** opt scf=maxcyc=200 guess=mix # int=ultrafine freq\O2 (singlet; de
lta symm)\0,1\0,0.,0.,0.5986248719\0,0.,0.,-0.5986248719\Version=ES6
4L-G09RevD.01\HF=-150.2495406\s2=1.003144\s2-1=0.\S2A=0.025158\RMSD=8.
358e-09\RMSF=6.713e-05\Dipole=0.,0.,0.\Quadrupole=0.1372345,0.1372345,
-0.274469,0.,0.,0.\PG=D*H [C*(O1.O1)]\@\
```

**3O<sub>2</sub>**

```
1\1\GINC-R39\FOpt\UM11\6-31+G(d,p)\O2(3)\ROOT\03-Sep-2015\0\#\ um11/6-
31+G** opt scf=maxcyc=200 # int=ultrafine freq\O2 (triplet; sigma sym
m)\0,3\0,-0.9915000146,-0.5791204217,0.0024636059\0,-0.8727889854,0.6
114364217,0.0011943941\Version=ES64L-G09RevD.01\State=3-SGG\HF=-150.2
668532\s2=2.005862\s2-1=0.\S2A=2.000017\RMSD=9.689e-09\RMSF=1.588e-04\
Dipole=0.,0.,0.\Quadrupole=0.1352511,-0.2746176,0.1393665,-0.0412786,0
.000044,0.0004413\PG=D*H [C*(O1.O1)]\@\
```

**EtO<sub>0</sub>**

```
1\1\GINC-R2587\FOpt\UM11\6-31+G(d,p)\C2H5O2(2)\ROOT\28-Aug-2015\0\#\ u
m11/6-31+g(d,p) opt=maxcyc=200 int=ultrafine scf=maxcyc=200 # freq=nor
aman\EtO0* radical\0,2\C,-1.1957328715,0.172548364,0.0079868741\H,-0
.8507191036,-0.8684410921,-0.0273754231\H,-0.8370186814,0.6878019264,-
0.8916191606\H,-2.2927112774,0.1750964187,-0.0012214347\C,-0.667478186
7,0.8435883665,1.2581233052\H,0.4292501213,0.8935845992,1.2877212672\H
,-1.0341167879,0.3781108438,2.1828271296\O,-1.154134052,2.2118754347,1
.2504903111\O,-0.7462769108,2.8673541987,2.297242881\Version=ES64L-G0
9RevD.01\State=2-A\HF=-229.4327509\s2=0.752909\s2-1=0.\S2A=0.750005\RM
SD=5.373e-09\RMSF=1.171e-04\Dipole=0.140594,-1.1869825,-0.4545345\Quad
rupole=0.9588507,-0.8492543,-0.1095965,0.0875405,-0.4633459,-1.0799122
\PG=C01 [X(C2H5O2)]\@\
```

**EtO**

```
1\1\GINC-R436\FOpt\UM11\6-31+G(d,p)\C2H5O1(2)\ROOT\28-Aug-2015\0\#\ um
11/6-31+g(d,p) opt=maxcyc=200 int=ultrafine scf=maxcyc=200 # freq=nora
man\EtO* radical\0,2\C,-2.3691308772,0.0228493915,-0.007383942\H,-2.
0039935754,-1.013214067,-0.009263671\H,-2.0146436386,0.5192664097,-0.9
197174698\H,-3.4662239504,0.0060767873,-0.0308145339\C,-1.8780295144,0
.7703296931,1.2261277933\H,-0.7698121421,0.7797913387,1.2933015936\H,-
2.1970623563,0.2752033442,2.1673055294\O,-2.2892995408,2.0790128262,1.
3100639878\Version=ES64L-G09RevD.01\State=2-A\HF=-154.2900465\s2=0.7
52842\s2-1=0.\S2A=0.750006\RMSD=7.776e-09\RMSF=1.311e-04\Dipole=0.2736
292,-0.8592328,-0.0492232\Quadrupole=1.1156688,-1.7040887,0.5884199,0.
4259406,-0.0729632,-1.0450998\PG=CS [SG(C2H1O1),X(H4)]\@\
```

**TScomb**

```
1\1\GINC-R538\FTS\UM11\6-31+G(d,p)\C4H10O4\ROOT\28-Aug-2015\0\#\ um11/
6-31+G** opt=(TS,calcf, noeigen,maxcyc=200) scf=maxcyc=200 # int=ultra
fine guess=mix freq=noraman nosymm\TS for 2 ROO* addition to ROOOOR\
0,1\H,2.8929547482,-0.431805946,-0.1143510265\C,1.9546045463,0.0406940
384,0.208054766\H,1.6161627903,-0.4145017753,1.1487445801\O,0.94524956
72,-0.2714870068,-0.7848827139\O,0.6134076672,-1.5441104249,-0.7099952
36\H,-1.6161892954,-0.4144995308,-1.1487130967\C,-1.9546204489,0.04073
31784,-0.2080373203\H,-2.892982204,-0.4317343082,0.1143824962\O,-0.945
2733591,-0.2714419947,0.7849100504\O,-0.6134608389,-1.5440752583,0.710
0603078\C,-2.0452832161,1.5496760142,-0.2894797259\H,-2.8330235468,1.8
380254041,-0.9967980155\H,-2.2849248923,1.9821792059,0.6904186367\H,-1
.0926332189,1.9660527282,-0.6413215256\C,2.0453039842,1.5496371602,0.2
894510036\H,1.092664306,1.9660479908,0.6412803634\H,2.8330516057,1.837
9890212,0.9967601657\H,2.284955805,1.9821045038,-0.6904607095\Version
=ES64L-G09RevD.01\HF=-458.8649417\s2=0.381125\s2-1=0.\S2A=0.00399\RMSD
=6.226e-09\RMSF=6.589e-07\Dipole=0.0000139,1.1589267,-0.0000176\Quadru
pole=6.1715756,-3.6193232,-2.5522524,-0.0001023,1.9686688,0.0000139\PG
=C01 [X(C4H10O4)]\@\
```

**EtO<sub>4</sub>Et**

```
1\1\GINC-R730\FOpt\RM11\6-31+G(d,p)\C4H10O4\ROOT\27-Apr-2015\0\#\ freq
m11/6-31+g(d,p) opt=maxcyc=200 int=ultrafine scf=maxcyc=200\EtO000Et
\0,1\H,0.1809789359,2.374738783,-0.0746462833\C,1.2042106064,2.092309
1482,-0.3641218765\O,1.1928743731,0.7179162912,-0.7813040382\O,0.69951
18351,-0.0613210412,0.2753153995\O,-0.6995118351,0.0613210412,0.275315
3995\O,-1.1928743731,-0.7179162912,-0.7813040382\C,-1.2042106064,-2.09
23091482,-0.3641218765\H,-0.1809789359,-2.374738783,-0.0746462833\C,-2
```

.2114755699,-2.345497773,0.7442983163\H,-3.2196285269,-2.0565307736,0.4213140298\H,-2.2198406271,-3.410846501,1.0103731517\H,-1.9509918259,-1.7686015703,1.6401380138\C,2.2114755699,2.345497773,0.7442983163\H,2.2198406271,3.410846501,1.0103731517\H,1.9509918259,1.7686015703,1.6401380138\H,3.2196285269,2.0565307736,0.4213140298\H,1.4643112781,2.6243997535,-1.2886477131\H,-1.4643112781,-2.6243997535,-1.2886477131\\Version=ES64L-G09RevD.01\State=1-A\HF=-458.8826516\RMSD=6.018e-09\RMSF=4.603e-06\Dipole=0.,0.,0.3184689\Quadrupole=-1.985996,5.6066023,-3.6206062,4.3377551,0.,0.\PG=C02 [X(C4H1004)]\\@

### TS1a

1\1\GINC-R170\FTS\UM11\6-31+G(d,p)\C4H1004\ROOT\28-Apr-2015\0\# freq um11/6-31+g(d,p) opt=(TS,calcf, noeigen,maxcyc=200) # int=ultrafine scf=maxcyc=200 guess=mix\\TS for single o-o break: EtO4Et\\0,1\H,1.5378630619,0.5151130758,1.2285992476\C,2.1155030545,0.620150363,0.2912883064\o,1.2656477267,0.8964860694,-0.7732115166\o,0.0121143462,-0.5854213101,-0.73532778\o,-0.2522341413,-0.8302908757,0.4789834912\o,-1.1372648044,0.1715140425,1.0724357021\C,-2.0235438468,0.7193474166,0.0916120786\H,-1.4357538351,1.1909430291,-0.7076185637\C,-3.0189080723,-0.3050111114,-0.4289420881\H,-3.5686658143,-0.7638650199,0.4023409735\H,-3.7377927127,0.182185357,-1.1005571324\H,-2.5102900964,-1.0953183361,-0.9953266089\C,3.0342909994,-0.5698298341,0.0468014868\H,3.7342088415,-0.703258651,0.8829936627\H,2.4401075389,-1.4876331092,-0.054673932\H,3.606228948,-0.4260729029,-0.8784261633\H,2.6918738511,1.5605999673,0.3969837163\H,-2.513931045,1.5111190437,0.6742671199\\Version=ES64L-G09RevD.01\State=1-A\HF=-458.8466454\S2=0.606464\S2-1=0.\S2A=0.011833\RMSD=8.426e-09\RMSF=2.391e-06\Dipole=-0.291536,0.1828046,0.2438403\Quadrupole=5.5962349,-1.4090682,-4.1871667,-0.7855279,2.5875772,0.9715278\PG=C01 [X(C4H1004)]\\@

### int-1

1\1\GINC-R813\FOpt\UM11\6-31+G(d,p)\C4H1004\ROOT\28-Apr-2015\0\# freq um11/6-31+g(d,p) opt=maxcyc=200 int=ultrafine scf=maxcyc=200 guess=mi x\EtO00\*--\*OEt radical dimer\\0,1\H,1.5367239237,0.4087104165,1.2420322564\C,2.1414739344,0.6361198556,0.3436196827\o,1.3318234235,1.1287846692,-0.6540712365\o,-0.2438857942,-1.1265171076,-0.7272810455\o,-0.4270802001,-1.1173479906,0.5097324114\o,-1.0337599449,0.1289037156,1.0146282705\C,-1.7681627077,0.8008638331,-0.0112296579\H,-1.111190763,0.9882683738,-0.8704660933\C,-3.045536346,0.0630080529,-0.3808288666\H,-3.6639714126,-0.1073931853,0.5092623913\H,-3.6227548183,0.655975499,-1.1023712817\H,-2.8196181641,-0.9054994407,-0.8447763424\C,3.0214733256,-0.5315451022,-0.0900866984\H,3.6806553556,-0.8459837978,0.7300917471\H,2.3938529489,-1.3846098973,-0.3789893398\H,3.6363587461,-0.2471653811,-0.9530578508\H,2.763568811,1.5135869492,0.6295428507\H,-1.9705693177,1.7653355378,0.4746008027\\Version=ES64L-G09RevD.01\State=1-A\HF=-458.8513721\S2=0.992423\S2-1=0.\S2A=0.048931\RMSD=5.113e-09\RMSF=8.798e-06\Dipole=-0.0813983,0.2910507,0.2966398\Quadrupole=5.3644561,-1.6795506,-3.6849055,-1.0189239,2.7401485,0.7579387\PG=C01 [X(C4H1004)]\\@

### TS2

1\1\GINC-R576\FTS\UM11\6-31+G(d,p)\C4H1004\ROOT\24-Jul-2015\0\# um11/6-31+G\*\* opt=(TS,calcf, noeigen,maxcyc=200) scf=maxcyc=200 freq=noraman # guess=read geom=allcheck int=ultrafine\\TS for second o-o single scission: dimerEt\\0,1\H,-1.51497156,-0.6699235231,1.1529061016\C,-2.1685704032,-0.8029725244,0.261600799\o,-1.2654938844,-1.0729950619,-0.7381689705\o,0.384066435,1.4882541667,-0.6551214719\o,0.2898916979,1.2499084361,0.5221789265\o,0.958884687,-0.3340477096,0.9608500796\C,1.6799350007,-0.758942879,-0.1471014895\H,1.1335748767,-0.4631739853,-1.0667199861\C,3.116744817,-0.2533919857,-0.1578603906\H,3.6425212698,-0.5690736244,0.7518908816\H,3.6591584003,-0.6372996194,-1.0321865787\H,3.1311228402,0.8445339187,-0.1999001847\C,-3.0125769068,0.4453952494,0.0174017442\H,-3.6591154681,0.6498608978,0.8811422741\H,-2.3669337251,1.3158182865,-0.1549551759\H,-3.649311218,0.3095015188,-0.8660997266\H,-2.7832760505,-1.697656378,0.4769922277\H,1.6032451917,-1.8607091831,-0.1273730598\\Version=ES64L-G09RevD.01\State=1-A\HF=-458.8442162\S2=1.299452\S2-1=0.\S2A=1.880435\RMSD=4.333e-09\RMSF=2.201e-06\Dipole=-0.1403022,-0.0375898,0.0674525\Quadrupole=4.3837794,-1.1764125,-3.207367,-0.7112359,-2.6217839,-0.3987174\PG=C01 [X(C4H1004)]\\@

### int-2

1\1\GINC-R2830\SP\UM11\6-31+G(d,p)\C4H1004(5)\ROOT\23-Jul-2015\0\# 6-31+g(d,p) um11 nosymm scf=maxcyc=200\\EtO\*--O2--\*OEt trimer intm\\0,5\H,0,1.201398,-0.984083,-0.745728\C,0,1.986949,-0.917453,0.044284\o,0,1.275329,-0.536729,1.15303\o,0,-0.391616,1.923107,0.476917\o,0,-0.037284,1.533338,-0.598109\o,0,-1.095857,-0.900207,-1.041499\C,0,-1.751906,-0.918878,0.16618\H,0,-1.041471,-0.552045,0.938888\C,0,-3.07552,-0.164957,0.175373\H,0,-3.766108,-0.594036,-0.561598\H,0,-3.544684,-0.211407,

1.16722\H,0,-2.912442,0.889989,-0.081362\C,0,3.088547,0.057061,-0.360953\H,0,3.572449,-0.270892,-1.290534\H,0,2.66953,1.059213,-0.516516\H,0,3.853156,0.119486,0.424014\H,0,2.352893,-1.955935,0.164114\H,0,-1.877719,-1.990994,0.429491\\Version=ES64L-G09RevD.01\HF=-458.8556441\S2=6.011524\S2-1=0.\S2A=6.000051\RMSD=5.780e-09\Dipole=-0.0271128,-0.2706208,0.0187057\Quadrupole=4.0195896,0.392171,-4.4117606,-0.1278641,-2.9537032,-0.7295823\PG=C01 [X(C4H1004)]\@\

#### TS1b

1\1\GINC-R193\FTS\RM11\6-31+G(d,p)\C4H1004\ROOT\28-Aug-2015\0\#\ freq m11/6-31+g(d,p) opt=(TS,calcf,ts,oeigen,maxcyc=200) # int=ultrafine scf =maxcyc=200\TS for concerted O-O cleavage and H transfer ROOOOR -> R' CHO + HOO\* + EtO\*\0,1\H,-2.3638496536,0.5879213536,-1.2225593421\C,-1.9166615517,0.5313930001,-0.2182030378\H,-1.5650076462,-0.502269444,-0.0730650641\C,-2.8740851582,0.9829071103,0.8729268548\H,-3.1953395889,2.0175712931,0.6992277179\H,-2.3883924905,0.9239513398,1.8554592103\H,-3.761003514,0.3358539681,0.8919024829\O,-0.8006643404,1.3907973242,-0.3588142435\H,3.9532546589,-0.6698684093,-0.4827212573\C,3.3199744585,0.1345712586,-0.0849474446\H,3.3962798352,0.1196882439,1.0094492064\H,3.6933754219,1.0937586319,-0.4651389091\C,1.8731554794,-0.1066397149,-0.5036405441\H,1.6049966803,0.0951761451,-1.563010966\H,1.2368127634,0.9014688844,-0.0401019663\O,1.2055879154,-1.0366145967,0.0731295461\O,0.1840158491,-1.1307423679,0.825562789\O,0.0376848812,-0.0036187558,1.3339539677\\Version=ES64L-G09RevD.01\State=1-A\HF=-458.8285521\RMSD=4.997e-09\RMSF=1.211e-06\Dipole=-0.1068921,0.4973917,-0.5053094\Quadrupole=6.4127485,-5.2153338,-1.1974147,1.5843536,-0.6670211,1.1046843\PG=C01 [X(C4H1004)]\@\

#### TS1c

1\1\GINC-R41\FTS\RM11\6-31+G(d,p)\C4H1004\ROOT\28-Aug-2015\0\#\ m11/6-31+G\*\* opt=(calcf,ts,oeigen,maxcyc=200) freq=noraman # scf=maxcyc=200\Concerted TS ROOR -> ROOR + O2\0,1\H,0.9451584527,-2.1080778696,0.06676753\C,1.9390513718,-1.6646289376,0.2020565704\H,2.1899955762,-1.6448167236,1.269650283\H,2.6791651613,-2.2829311128,-0.3209469674\C,1.9455424537,-0.2694400408,-0.3867662931\H,1.6529683418,-0.263205512,-1.4443664704\H,2.8952186907,0.2630921374,-0.2364187745\O,0.9138029528,0.45829584,0.3306681095\O,0.8785445448,1.7469508773,-0.1521142928\O,-0.3034959549,-2.16541597,-0.0166774094\O,-0.7967979463,-0.1412250004,-0.7956136957\C,-1.8697295168,-0.0634200969,0.0381160736\H,-2.6093746792,0.6737892418,-0.3465817445\H,-1.5252956928,0.3972846321,1.0016935684\C,-2.4867457502,-1.4311209961,0.3434905532\H,-1.7363472785,-2.0913429002,0.7994845516\H,-2.8453799179,-1.9032225669,-0.5800867612\H,-3.3330258091,-1.3287539418,1.0368991691\\Version=ES64L-G09RevD.01\State=1-A\HF=-458.7750789\RMSD=6.349e-09\RMSF=4.423e-06\Dipole=1.0449291,-0.8256403,0.3320153\Quadrupole=5.3890266,-3.3464006,-2.042626,-0.5534086,-1.5860498,-0.095272\PG=C01 [X(C4H1004)]\@\

#### TS1d

1\1\GINC-R209\FTS\RM11\6-31+G(d,p)\C4H1004\ROOT\28-Aug-2015\0\#\ freq m11/6-31+g(d,p) opt=(TS,calcf,ts,oeigen,maxcyc=200) # int=ultrafine scf =maxcyc=200\TS for Russell's concerted O-O cleavage and H transfer\0,1\O,-0.035173315,0.2497955077,-0.1075020217\O,-0.6854367723,0.5258976129,1.954785221\O,0.3520159233,0.0699439208,2.4719739782\O,1.5093968506,0.8165983904,2.1908395046\C,1.3097062505,1.8304834759,1.2642919445\H,0.9082741022,1.2208103071,0.2667522516\H,0.4150583935,2.4239406096,1.5164818013\C,-0.1539883144,-0.5747178568,-1.2301115096\H,-0.634679445,-0.0451648138,-2.0725588838\H,0.8492069391,-0.9102774539,-1.5554843361\C,2.6034288101,2.6038836877,1.1376623025\H,3.4323098185,1.9374899508,0.8705954006\H,2.8555829341,3.1246629154,2.0711990077\H,2.4895397404,3.3509570048,0.3431527566\C,-0.9818967435,-1.8080522715,-0.8442414576\H,-0.490573356,-2.3479458219,-0.0248195469\H,-1.0923907605,-2.4827925212,-1.7041194532\H,-1.9773810555,-1.495512644,-0.5048969594\\Version=ES64L-G09RevD.01\State=1-A\HF=-458.7829203\RMSD=7.153e-09\RMSF=1.185e-06\Dipole=0.6711371,0.5149167,-0.2111265\Quadrupole=-1.3938096,2.2734061,-0.8795965,2.3121644,0.0740672,1.7378735\PG=C01 [X(C4H1004)]\@\

#### TS1e

1\1\GINC-R217\FTS\RM11\6-31+G(d,p)\C4H1004\ROOT\28-Aug-2015\0\#\ freq m11/6-31+g(d,p) opt=(TS,calcf,ts,oeigen,maxcyc=200) # int=ultrafine scf =maxcyc=200\TS for concerted O-O cleavage and H transfer ROOOOR -> R' CHO + ROOOH\0,1\H,0.6457153397,-0.8474295228,0.7997076047\C,0.340133594,-1.5992577071,1.5377949491\H,1.1001177624,-2.3897525172,1.5690372833\H,0.2922424092,-1.1212343116,2.5243284349\C,-1.0181261299,-2.1779666887,1.1874566358\H,-1.7960117659,-1.4018565045,1.1306684678\H,-1.3299157983,-2.9614012629,1.8954511702\O,-0.8677827991,-2.7736349806,-0.1148385773\O,-2.1164277141,-3.374155669,-0.4521562114\O,-2.2528846192,-4.4798121576,0.2337859433\O,-2.8495236267,-5.1811931622,1.9269566271\C,-2

.337504,-6.3169456514,1.537118764\H,-3.0821785564,-7.1018566806,1.2978  
529984\C,-1.040553111,-6.7696889473,2.2019245237\H,-0.3234799349,-5.93  
87750953,2.2077629244\H,-0.6003072567,-7.6229860559,1.671134526\H,-1.2  
395126996,-7.0653327203,3.2405214386\H,-1.9970010933,-5.9747203648,0.3  
854924976\\Version=ES64L-G09RevD.01\State=1-A\HF=-458.8077803\RMSD=6.5  
71e-09\RMSF=4.578e-07\Dipole=0.6212026,-0.3110208,0.4988163\Quadrupole  
=-3.2704958,6.7314595,-3.4609637,0.9193429,1.9763696,1.646791\PG=C01 [X(C4H1004)]\@

#### TS1f

1\1\GINC-R1751\FTS\UM11\6-31+G(d,p)\C4H1004\ROOT\28-Aug-2015\0\# um11  
/6-31+G\*\* opt=(TS,calcf,oeigen,maxcyc=200) scf=maxcyc=200 # int=ultra  
fine guess=mix freq=noraman nosymm\TS for ROO\* H abstraction from RO  
O\*\0,1\H,2.5876583642,0.9363111187,-0.8652608539\C,1.8717871706,0.273  
8398009,-0.357217969\H,1.3892951344,-0.3777131202,-1.1024909576\O,0.85  
0832151,1.09514173,0.2399925117\O,0.0545031843,1.6160871966,-0.7289837  
806\H,-0.8947870221,0.8122658988,-0.7397179712\C,-1.7034049496,-0.1238  
483049,-0.3329283868\H,-2.1950132279,-0.4910940676,-1.241242621\O,-0.8  
374335476,-1.0701828527,0.1782321981\O,-0.3354198665,-1.8839031642,-0.  
7036326229\C,-2.5089246514,0.5146533628,0.7644693376\H,-3.0813827749,1  
.3558125235,0.3569185271\H,-3.2065827077,-0.2034658186,1.2174304922\H,  
-1.832946356,0.896644082,1.5407738372\C,2.498822229,-0.5281592218,0.76  
47511928\H,1.7484292445,-1.1891412261,1.217081171\H,3.3143438979,-1.14  
58261146,0.3680574227\H,2.907139728,0.1339791773,1.5387974723\Version  
=ES64L-G09RevD.01\HF=-458.8433367\S2=0.737441\S2-1=0.\S2A=0.037984\RMS  
D=6.215e-09\RMSF=2.423e-06\Dipole=-0.4930083,0.0232038,0.1008113\Quadr  
upole=8.0651314,-6.8602437,-1.2048876,-1.1004772,-0.2228871,-0.2299015  
\PG=C01 [X(C4H1004)]\@

#### TS1g

1\1\GINC-R37\FTS\UM11\6-31+G(d,p)\C4H1004\ROOT\16-Jan-2016\0\# um11/6  
-31+G\*\* opt=(calcf,ts,oeigen,maxcyc=200) freq int=ultrafine scf=maxc  
yc=200 guess=read geom=allcheck\EtOO\* + EtOO\* -> EtOOEt + 102\0,1\C,  
-1.0962774595,-0.3430985285,-0.191556439\C,-1.083533563,-1.5822002046,  
0.6539471051\H,-1.8801446783,-1.5372658161,1.4098385398\H,-0.119912784  
7,-1.6726619422,1.170134258\H,-1.2335045309,-2.4741388497,0.0360932502  
\O,-2.8126109474,0.3610677138,0.4231675819\O,-3.1083692192,1.434832100  
8,-0.1160172764\H,-0.655946396,0.5831280442,0.1715761474\H,-1.50361186  
28,-0.3411465451,-1.1989144665\O,0.6405716961,-0.6974112548,-1.0968047  
311\O,1.6206411622,-0.5888062602,-0.1876102346\C,2.2286270985,0.712847  
6707,-0.2690192315\H,1.4538024195,1.4644411032,-0.0454437901\H,2.57168  
71682,0.8589900358,-1.3026811093\C,3.363706585,0.7424142977,0.73479734  
49\H,4.105623637,-0.0308785983,0.5007652793\H,2.9890548154,0.571457436  
6,1.7516546832\H,3.8593468598,1.7208585966,0.7068620888\\Version=ES64L  
-G09RevD.01\State=1-A\HF=-458.803962\S2=1.107353\S2-1=0.\S2A=0.785588\  
RMSD=8.067e-09\RMSF=1.808e-06\Dipole=1.0763414,0.1812552,0.3134706\Qua  
drupole=-0.6790025,0.1989615,0.480041,6.3252431,1.0591637,-0.4817154\PG  
=C01 [X(C4H1004)]\@

#### EtOH

1\1\GINC-CA012\Fopt\RM11\6-31+G(d,p)\C2H6O1\ROOT\04-Sep-2015\0\# m11/  
6-31+G\*\* int=ultrafine freq=noraman opt=maxcyc=200 scf=maxcyc=200\Eth  
anol\0,1\C,-2.3600503965,0.0401545124,0.0174087217\H,-2.0107922827,-1  
.0006114469,-0.0136207398\H,-2.0054936805,0.559366255,-0.8822008866\H,  
-3.4575236542,0.0455909999,0.0068427887\C,-1.8477158335,0.7433969206,1  
.2605801433\H,-0.743908675,0.7386517723,1.2742222359\H,-2.2021983947,0  
.2226616162,2.1670986059\O,-2.3382660816,2.0808622962,1.2323058864\H,-  
2.0324047925,2.5603713528,2.0089602473\\Version=AS64L-G09RevD.01\State  
=1-A\HF=-154.9657945\RMSD=2.245e-09\RMSF=8.080e-05\Dipole=0.4232014,-  
0.3100647,0.5120081\Quadrupole=-0.7483599,-0.391188,1.1395479,0.996277  
7,0.4843126,1.8012263\PG=CS [SG(C2H2O1),X(H4)]\@

#### aldehyde

1\1\GINC-R1983\Fopt\RM11\6-31+G(d,p)\C2H4O1\ROOT\09-Jul-2014\0\# m11/  
6-31+G\*\* opt freq=noraman\Acetaldehyde\0,1\C,-2.3527369222,0.0191123  
064,0.0171933131\H,-2.0058861727,-1.0195231036,-0.0165850337\H,-2.0060  
655968,0.5539146911,-0.8769705985\H,-3.4504932805,0.0427820943,0.00742  
91437\C,-1.8569478725,0.7443985292,1.2461073794\O,-2.1222913095,1.9010  
288246,1.4810248986\H,-1.2186464458,0.1679682681,1.9556224674\\Version  
=ES64L-G09RevD.01\State=1-A\HF=-153.753906\RMSD=3.004e-09\RMSF=2.694e-  
05\Dipole=0.1348858,-1.1052252,-0.4182938\Quadrupole=0.9868641,-1.5311  
037,0.5442396,0.0932921,0.2350672,-1.2384991\PG=C01 [X(C2H4O1)]\@

#### EtOOEt

1\1\GINC-CA012\Fopt\RM11\6-31+G(d,p)\C4H10O2\ROOT\04-Sep-2015\0\# m11  
/6-31+G\*\* int=ultrafine freq=noraman opt=maxcyc=200 scf=maxcyc=200\Et

OOEt\0,1\C,-2.7331047584,-0.5384614132,0.0342937689\H,-2.3767314672,-1.5762333069,0.0173472631\H,-2.3744747888,-0.0316779904,-0.8709108137\H,-3.8303485024,-0.5460224918,0.018212406\C,-2.2208767293,0.1832512314,1.2678484258\H,-1.1196824685,0.188986703,1.3117100155\H,-2.5802592958,1.2241301138,1.3125793189\O,-2.7239071456,-0.5274637662,2.3921571808\O,-2.2267165341,0.1731060876,3.5359896308\C,-2.7297490469,-0.5376074241,4.660298387\H,-2.3703683177,-1.5784869771,4.6155682832\H,-3.8309432843,-0.5433409396,4.6164360091\C,-2.217520577,0.1841049081,5.8938530436\H,-2.5738919819,1.2218774639,5.910798782\H,-2.5761521084,-0.3226774078,6.7990576272\H,-1.1202768322,0.1916639871,5.9099351728\Version=AS64L-G09RevD.01\State=1-A\HF=-308.6449007\RMSD=1.714e-09\RMSF=1.426e-04\Dipole=-0.000001,0.000007,0.\Quadrupole=-1.8373823,-2.1166643,3.9540466,-0.3998323,-0.8444099,-1.1960726\PG=C02 [X(C4H10O2)]\@

#### EtOOH

1\1\GINC-CA012\Fopt\RM11\6-31+G(d,p)\C2H6O3\ROOT\04-Sep-2015\0\# m11/6-31+G\*\* int=ultrafine freq=noraman opt=maxcyc=200 scf=maxcyc=200\Ethyltrioxide\0,1\C,-3.0032352379,-0.1527775097,0.0123803419\H,-2.6516359001,-1.1917895116,-0.0138161106\H,-2.6448687075,0.3619805516,-0.8873457953\H,-4.0999706413,-0.1528803718,0.0033808995\C,-2.4810287336,0.5333340243,1.2620516933\H,-1.3798957984,0.5625677611,1.2821179795\H,-2.8455727341,0.0439658325,2.1793179718\O,-2.9827879725,1.8679954857,1.2138364924\O,-2.4753830873,2.4751690319,2.3936980533\O,-3.008258937,3.7870512154,2.2814996853\H,-2.6499126505,4.1791516405,3.0936251889\Version=AS64L-G09RevD.01\State=1-A\HF=-305.1758145\RMSD=8.236e-09\RMSF=4.665e-05\Dipole=0.4278852,-0.5124362,0.4028631\Quadrupole=-2.6177414,1.9261485,0.6915929,1.0420699,0.4577334,4.2779886\PG=C01 [X(C2H6O3)]\@

#### criegee

1\1\GINC-R927\Fopt\RM11\6-31+G(d,p)\C2H4O2\ROOT\07-Sep-2015\0\# m11/6-31+G\*\* opt freq int=ultrafine\Criegee intm\0,1\C,-0.9232989348,0.0802490449,0.0710909704\H,-0.7395601733,0.7680324422,-0.7621794032\C,-0.7387877484,-1.3911174352,0.014862439\H,-0.9902974572,-1.8439928135,0.9793396966\H,-1.3771007553,-1.8176694549,-0.7714928562\H,0.3028379433,-1.6271739783,-0.2439815239\O,-1.3168264221,0.6040403254,1.1348775191\O,-1.4794244523,1.9448672594,1.1683018581\Version=ES64L-G09RevD.01\State=1-A\HF=-228.8070731\RMSD=9.701e-09\RMSF=1.691e-05\Dipole=0.5922946,-1.9403707,-1.1850726\Quadrupole=0.9215911,-2.0907432,1.1691521,0.8279531,0.1350363,-1.4988255\PG=C01 [X(C2H4O2)]\@

#### EtOOH

1\1\GINC-CA012\Fopt\RM11\6-31+G(d,p)\C2H6O2\ROOT\04-Sep-2015\0\# m11/6-31+G\*\* int=ultrafine freq=noraman opt=maxcyc=200 scf=maxcyc=200\Ethylperoxide\0,1\C,-3.0022846619,-0.1591323915,0.0102558197\H,-2.6455940886,-1.1969320124,-0.0069287802\H,-2.6443837483,0.3472446549,-0.8950752112\H,-4.0994854705,-0.1676214125,-0.0043517178\C,-2.4881611473,0.5411083061,1.2548981568\H,-1.3869973329,0.5768940158,1.2823992683\H,-2.8497372903,0.0593245749,2.1777989113\O,-2.9892107192,1.8708336506,1.2049985922\O,-2.487294462,2.500431447,2.3888631885\H,-2.862348939,3.3867606771,2.2885064225\Version=AS64L-G09RevD.01\State=1-A\HF=-230.0728593\RMSD=9.521e-09\RMSF=1.471e-04\Dipole=-0.057421,-0.1235994,-0.1652393\Quadrupole=-1.515246,3.3750098,-1.8597638,-0.8922767,-0.7550575,1.2844599\PG=C01 [X(C2H6O2)]\@

===n-Butyl===

#### nBuOH

1\1\GINC-R233\Fopt\UM11\6-31+G(d,p)\C4H10O1\ROOT\10-Jan-2016\0\# um11/6-31+g(d,p) opt=maxcyc=200 scf=maxcyc=200 freq=noraman int=ultrafine\ROH R = n-butyl\0,1\H,-1.6312030428,0.7879105911,0.893540971\C,-1.4607286717,0.1603929607,0.\C,-0.0313543937,-0.3560455056,0.\H,0.1083790786,-0.9982335642,0.8834169086\H,0.1083790786,-0.9982335642,-0.8834169086\C,0.998615618,0.7756684626,0.\H,0.8392657466,1.4170976636,-0.881963668\H,0.8392657466,1.4170976636,0.881963668\C,2.4353117859,0.2505030294,0.\H,3.1667839034,1.069530458,0.\H,2.6245541611,-0.3710642882,0.8869531147\H,-2.6245541611,-0.3710642882,-0.8869531147\H,-1.6312030428,0.7879105911,-0.893540971\O,-2.3377216839,-0.9606171455,0.\H,-3.2533422156,-0.6638836336,0.\Version=ES64L-G09RevD.01\State=1-A\HF=-233.5416819\S2=0.\S2-1=0.\S2A=0.\RMSD=3.586e-09\RMSF=1.858e-05\Dipole=-0.1526295,0.6932483,0.\Quadrupole=3.1305003,-2.730262,-0.4002384,-2.4299568,0.,0.\PG=CS [SG(C4H2O1),X(H8)]\@

#### aldehyde

1\1\GINC-R328\Fopt\RM11\6-31+G(d,p)\C4H8O1\ROOT\17-Dec-2015\0\# m11/6-31+g(d,p) freq opt=maxcyc=200 scf=maxcyc=300 int=ultrafine\Butanal (singlet)\0,1\O,-0.6950898665,0.2094174114,0.5210707193\C,-1.7493963085,0.7761823168,0.3457464047\C,-3.0279600017,0.0985155468,-0.0780212293

\H, -3.7236914051, 0.1446594365, 0.7777645277\H, -2.8144698174, -0.9587397678, -0.2841816864\H, -1.8184215777, 1.8822354121, 0.4927882707\c, -3.6701520654, 0.7990232832, -1.2842262428\H, -3.8059335556, 1.8682176039, -1.0563865943\H, -2.9845020184, 0.7462871921, -2.1431719999\c, -5.0160733947, 0.1748338624, -1.6551608132\H, -5.4646594459, 0.6768414036, -2.522136644\H, -4.8994593508, -0.8891898849, -1.9044405088\H, -5.7256530723, 0.2461013738, -0.8184032538\Version=ES64L-G09RevD.01\State=1-A\HF=-232.3308584\RMSD=7.519e-09\RMSF=4.624e-06\Dipole=-1.208268, 0.3910312, -0.3104446\Quadrupole=-4.4192578, 2.4787275, 1.9405303, 1.3087702, -2.463999, 0.8367613\PG=C01 [X(C4H8O1)]\@

**aldehyde\* (triplet)**

1\1\GINC-R512\Fopt\UM11\6-31+G(d,p)\C4H8O1(3)\ROOT\17-Dec-2015\0\# um11/6-31+g(d,p) freq opt=maxcyc=200 scf=maxcyc=300 int=ultrafine\Butanal (triplet)\0,3\O, -0.9146395161, 0.1752278678, 1.0641950336\c, -1.6441782438, 0.7788844347, 0.1565524088\c, -2.9778360374, 0.109860476, -0.1589753285\H, -3.6118945253, 0.0993651539, 0.7458454623\H, -2.7876321677, -0.9395431452, -0.4286106119\H, -1.6659741855, 1.874054706, 0.3030642241\c, -3.6978812567, 0.8271432868, -1.3038957243\H, -3.8587308933, 1.8811376663, -1.0280774822\H, -3.048848387, 0.8292442312, -2.1914143889\c, -5.0374596947, 0.164895081, -1.6296159211\H, -5.5493849988, 0.6826400177, -2.4512364896\H, -4.895025878, -0.8830778505, -1.9297097063\H, -5.7059760958, 0.1745532642, -0.7568805161\Version=ES64L-G09RevD.01\State=3-A\HF=-232.2095959\S2=2.00494\S2-1=0.\S2A=2.000013\RMSD=6.649e-09\RMSF=1.803e-05\Dipole=-0.7611676, 0.2874852, -0.3147332\Quadrupole=-2.2559394, 2.496353, -0.2404136, 1.0158809, -1.4003748, 1.038386\PG=C01 [X(C4H8O1)]\@

**BUOOBU**

1\1\GINC-R39\Fopt\RM11\6-31+G(d,p)\C8H18O2\ROOT\07-Jan-2016\0\# m11/6-31+g(d,p) opt=maxcyc=200 scf=maxcyc=200 freq=norman int=ultrafine\BuOOBU\0,1\c, 0.2882104421, 2.9579778727, -0.0000382393\H, -0.3522711729, 3.0961574725, -0.8846924478\H, -0.352342568, 3.0961067834, 0.8845723273\c, 0.8361379285, 1.5392724657, -0.0000525555\H, 1.4500261616, 1.3454199205, -0.895751835\H, 1.4500063863, 1.3453934996, 0.8956548288\O, -0.2788822432, 0.6593517332, -0.0000778252\O, 0.2788822417, -0.6593517335, -0.0000857341\c, -0.8361379292, -1.5392724662, -0.0000431796\H, -1.450042789, -1.3454165036, -0.8957303211\H, -1.4499897601, -1.3453969175, 0.895676342\c, -0.2882104428, -2.9579778733, -0.0000444815\H, 0.3523603563, -3.0961094947, 0.8845527849\H, 0.3522533818, -3.0961547627, -0.8847119885\c, 1.4117073296, 3.9988035673, 0.000037298\H, 2.0537950292, 3.8444705567, -0.8817923681\H, 2.053707451, 3.844428445, 0.881922205\c, 0.8710207863, 5.4295784505, 0.0000473584\H, 0.2479222829, 5.6129348454, 0.8872217938\H, 1.682946369, 6.1688308165, 0.0001044204\H, 0.2480067279, 5.6129774818, -0.8871767652\c, -1.4117073284, -3.9988035685, 0.0000504996\H, -2.0536893372, -3.8444312415, 0.8819488839\H, -2.0538131393, -3.8444677636, -0.8817655322\c, -0.8710207838, -5.4295784505, 0.0000450828\H, -1.6829463637, -6.1688308187, 0.0001167662\H, -0.2480251165, -5.6129748161, -0.8871924802\H, -0.24790389, -5.6129375106, 0.8872060767\Version=ES64L-G09RevD.01\State=1-A\HF=-465.7961474\RMSD=4.911e-09\RMSF=2.661e-05\Dipole=0., 0., 0.0000406\Quadrupole=-1.9216159, 3.31268, -1.3910641, 3.1457697, 0.0000118, -0.0000208\PG=C01 [X(C8H18O2)]\@

**BUO**

1\1\GINC-CA037\Fopt\UM11\6-31+G(d,p)\C4H9O1(2)\ROOT\11-Sep-2015\0\# um11/6-31+g(d,p) opt=maxcyc=200 scf=maxcyc=200 freq=norman int=ultrafine\ROO\* R = n-butyl\0,2\H, -2.0181003583, -0.6835087497, 1.2570296745\c, -2.3657632063, -0.9518540652, 0.2356703344\O, -1.2533156179, -1.3139368185, -0.4832642314\c, -3.2092369938, 0.1610230575, -0.3789334164\H, -2.5757572098, 1.0515720319, -0.5135749528\H, -3.5305056673, -0.1529156831, -1.3842847791\c, -4.4272555887, 0.5048670712, 0.4809919706\H, -5.0451017862, -0.397757175, 0.6187819756\H, -4.0922643907, 0.80431959, 1.4877489549\c, -5.2757031248, 1.620027541, -0.1313166238\H, -6.1459358159, 1.8572471871, 0.4947532258\H, -4.6857585972, 2.5400213929, -0.2514313086\H, -5.6445148307, 1.330477564, -1.1257961394\H, -2.9631934698, -1.8758155122, 0.3951253137\Version=AS64L-G09RevD.01\State=2-A\HF=-232.8661577\S2=0.752851\S2-1=0.\S2A=0.750006\RMSD=4.430e-09\RMSF=1.045e-04\Dipole=-0.7731046, 0.2733732, 0.4695545\Quadrupole=-2.6217226, 1.0239681, 1.5977545, 2.8306567, 1.9630085, -0.73058\PG=CS [SG(C4H101),X(H8)]\@

**BUOO**

1\1\GINC-CA116\Fopt\UM11\6-31+G(d,p)\C4H9O2(2)\ROOT\11-Sep-2015\0\# um11/6-31+g(d,p) opt=maxcyc=200 scf=maxcyc=200 freq=norman int=ultrafine\ROO\* R = n-butyl\0,2\H, -1.9977452139, -0.646646918, 1.2348620605\c, -2.391463238, -0.9385048158, 0.2512959668\O, -1.250335797, -1.2568495664, -0.5866103862\O, -0.3655253026, -0.302346171, -0.5578945263\c, -3.2303895736, 0.161921205, -0.3766008763\H, -2.5921742505, 1.0471694184, -0.5164621322\H, -3.5632198125, -0.1633276614, -1.374316808\c, -4.4404000048, 0.5132650528, 0.4939396114\H, -5.0574564175, -0.3862797661, 0.6490258577\H, -4.094058



605,0.8292071209,1.4907502128\C,-5.2918810168,1.6200383266,-0.13034959  
16\H,-6.1551584895,1.8679161732,0.5007162462\H,-4.701168476,2.53636379  
84,-0.2699042113\H,-5.6708695122,1.3144477443,-1.1158992598\H,-2.93910  
032,-1.886475951,0.3323338462\\Version=AS64L-G09RevD.01\State=2-A\HF=-  
308.0092353\S2=0.752951\S2-1=0.\S2A=0.750005\RMSD=5.840e-09\RMSF=3.561  
e-05\Dipole=-1.1799634,0.0294294,0.5035732\Quadrupole=-3.7174892,1.917  
7154,1.7997738,1.1747575,1.7872287,-0.8970353\PG=C01 [X(C4H9O2)]\@\

#### TScomb (<sup>n</sup>Bu)

1\1\GINC-R123\FTS\UM11\6-31+G(d,p)\C8H18O4\ROOT\10-Dec-2015\0\#\ um11/  
6-31+G(d,p) opt=(ts,calcf, noeigen,maxcyc=200) scf=maxcyc=300 # freq=n  
oraman guess=read geom=allcheck nosymm iop(1/8=1) int=ultrafine\\TS fo  
r ROO--OOR symmetric O-O bond cleavage (R = n-Bu)\\0,1\H,1.696274817,0.  
9506834805,-0.5312236007\C,2.0048717075,-0.0962204213,-0.67099719\O,0.  
8959977431,-0.9184787451,-0.2352382758\O,0.5432088923,-0.5870042125,0.  
9918053941\O,-0.5495023407,0.9112101607,0.7234890883\O,-0.9006373932,0  
.7973317906,-0.5429200671\C,-2.0090157538,-0.1253472746,-0.6685565979\  
H,-1.7007489079,-1.0589941727,-0.174546781\C,3.2769110742,-0.425256105  
9,0.0923326168\H,3.0885582523,-0.2766582412,1.1658945744\H,3.522630719  
9,-1.488798529,-0.0534957149\C,-3.2819787042,0.4469470894,-0.067715855  
3\H,-3.0940976701,0.6806460241,0.9906549413\H,-3.5287806573,1.39330153  
09,-0.5739131862\C,4.4466856272,0.4517985732,-0.3632949654\H,4.6101125  
118,0.3168603945,-1.444815025\H,4.1853587345,1.5120374718,-0.218339361  
4\C,-4.4505156594,-0.5352365976,-0.1904757703\H,-4.6137105806,-0.78439  
16787,-1.2515470458\H,-4.1878506999,-1.4788076375,0.313585509\C,5.7353  
841818,0.1301009097,0.3953499333\H,6.5678675455,0.7644338675,0.0636577  
678\H,5.6019963017,0.2850546395,1.4754268167\H,6.0286620835,-0.9185256  
609,0.2432570072\C,-5.739889314,0.0282049768,0.4093434001\H,-6.5713873  
111,-0.6830286045,0.3189115316\H,-5.606654224,0.2583483292,1.475941372  
3\H,-6.0345481671,0.9582402504,-0.0975813979\H,-2.0951209373,-0.291308  
6246,-1.7507214218\H,2.0925041281,-0.3151889828,-1.7435716962\\Version  
=ES64L-G09RevD.01\HF=-616.0160412\S2=0.39613\S2-1=0.\S2A=0.004405\RMSD  
=9.963e-09\RMSF=3.156e-06\Dipole=0.0008065,-0.1389154,-0.7764745\Quadr  
upole=7.2791092,-4.5741311,-2.7049781,1.1448094,-0.1946137,0.3318099\  
PG=C01 [X(C8H18O4)]\@\

#### <sup>n</sup>BuO<sup>n</sup>Bu

1\1\GINC-R2648\Fopt\RM11\6-31+G(d,p)\C8H18O4\ROOT\29-Aug-2015\0\#\ m11/  
/6-31+G\*\* opt=maxcyc=200 scf=maxcyc=200 # int=ultrafine freq=norman\\  
RO4R R = n-butyl\\0,1\H,1.9763174323,-0.4753494767,1.3688126546\C,2.43  
80483583,-0.081888124,0.4492179699\O,1.3958123989,0.3638825816,-0.4302  
994485\O,0.5235071272,-0.710133293,-0.6631849499\O,-0.3222712691,-0.81  
86348814,0.4516407937\O,-1.267960507,0.2144979605,0.3681611311\C,-2.28  
11401957,-0.1739397213,-0.5705118885\H,-1.7977903067,-0.4009748493,-1.  
5340932316\C,3.3637177691,-1.0967791382,-0.2044127127\H,2.7761402896,-  
1.9771610385,-0.5056527128\H,3.7829841844,-0.6580041536,-1.1231505225\  
C,-3.1311281804,-1.3324211284,-0.0709722321\H,-2.4825551324,-2.2036695  
481,0.1060716301\H,-3.5752331385,-1.0575736387,0.8983662551\C,4.491997  
6078,-1.521587144,0.7397479328\H,5.0661783969,-0.6334583537,1.04980345  
3\H,4.0587647971,-1.9466925211,1.6593157119\C,-4.2319315545,-1.6969982  
508,-1.0710874273\H,-4.8677155486,-0.8159274124,-1.2557049961\H,-3.774  
8457533,-1.9572693824,-2.0392513878\C,5.4315323599,-2.5415071795,0.094  
2051449\H,6.2367251328,-2.8394912731,0.7786129276\H,4.8830146897,-3.44  
859182,-0.1972890204\H,5.895275612,-2.1276411186,-0.812663959\C,-5.095  
4451137,-2.8602591229,-0.580315377\H,-5.8814412741,-3.1138302393,-1.30  
38176776\H,-4.4840414886,-3.7592105868,-0.4168688226\H,-5.5822528393,-  
2.6114083085,0.3735431403\H,-2.8751359617,0.7435001224,-0.6884696389\  
H,2.9676936477,0.8486653295,0.6981898402\\Version=ES64L-G09RevD.01\Stat  
e=1-A\HF=-616.0343344\RMSD=4.471e-09\RMSF=5.818e-06\Dipole=0.0135084,-  
0.3878381,-0.0275023\Quadrupole=7.4173507,-4.2394015,-3.1779492,0.1678  
481,3.3597023,0.0415354\PG=C01 [X(C8H18O4)]\@\

#### TS1a (<sup>n</sup>Bu)

1\1\GINC-R2666\FTS\UM11\6-31+G(d,p)\C8H18O4\ROOT\29-Aug-2015\0\#\ um11/  
/6-31+G\*\* opt=(ts,calcf, noeigen,maxcyc=200) scf=maxcyc=200 # int=ultr  
afine freq=norman guess=mix nosymm\\TS for single RO--O bond cleavage  
(R = n-butyl)\\0,1\H,-1.7167763377,-1.0172019141,0.8552839289\C,-2.04  
46847764,-1.0809158782,-0.2008426902\O,-0.9485608961,-1.1711932189,-1.  
0483966151\O,0.0948681513,0.3976064813,-0.5964078458\O,0.0365060908,0.  
549234975,0.6588948874\O,0.8643136842,-0.4184895409,1.3818980063\C,1.9  
970625414,-0.8098301419,0.6032034693\H,1.6575288539,-1.2509086397,-0.3  
453590118\C,-3.021615975,0.0356307915,-0.5549734375\H,-2.4931794739,0.  
9992496412,-0.4783229428\H,-3.3236319462,-0.0779828999,-1.6074690479\C  
2.9996509213,0.3175216963,0.3982138175\H,2.5254853671,1.132299243,-0.  
1703382988\H,3.2819784172,0.7280831484,1.379883574\C,-4.2497341831,0.0  
392549441,0.357930283\H,-4.7694312326,-0.9296073904,0.278313718\H,-3.9  
24527216,0.130464132,1.4068802142\C,4.2430875797,-0.1714121807,-0.3504

05369\H,4.7110102535,-0.9944842209,0.2136357221\H,3.9406035869,-0.5926  
430661,-1.3221385399\C,-5.2201165133,1.172313448,0.0199507555\H,-6.097  
6383757,1.1650317393,0.679990728\H,-4.7288706055,2.1505644098,0.122141  
4461\H,-5.5765302097,1.0865128583,-1.0166258091\C,5.2620358239,0.94822  
75369,-0.5681319792\H,6.1493521482,0.5873684815,-1.1045778974\H,4.8231  
507042,1.7675738555,-1.1551251288\H,5.5954205948,1.3676132753,0.391936  
9412\H,2.4152736563,-1.6141192018,1.2261263681\H,-2.5261296332,-2.0750  
943637,-0.3043172465\\Version=ES64L-G09RevD.01\HF=-615.9986343\S2=0.59  
9913\S2-1=0.\S2A=0.011563\RMSD=3.907e-09\RMSF=1.181e-06\Dipole=0.26255  
47,-0.1420298,0.2601413\Quadrupole=6.7913688,-1.6907059,-5.1006629,0.1  
298485,-0.0902582,-0.9542625\PG=C01 [X(C8H18O4)]\@

#### int-1 (#Bu)

1\1\GINC-R2462\Fopt\UM11\6-31+G(d,p)\C8H18O4\ROOT\31-Aug-2015\0\#\ um1  
1/6-31+G\*\* opt=(maxcyc=200) scf=(maxcyc=200) # freq=noraman guess=mix  
nosymm\ROO\* + RO\* caged complex (R = n-Butyl)\0,1\H,-1.667657,-0.80  
9825,1.104875\C,-2.024209,-1.222339,0.140277\O,-0.960509,-1.608601,-0.  
639722\O,0.171161,0.866993,-0.728221\O,0.058006,1.054029,0.502269\O,0.  
773299,0.060985,1.328752\C,1.818857,-0.57325,0.59235\H,1.410665,-1.008  
876,-0.33048\C,-3.018936,-0.293041,-0.554183\H,-2.480333,0.610861,-0.8  
79525\H,-3.394243,-0.785828,-1.464079\C,3.006054,0.346365,0.337503\H,2  
.690287,1.185809,-0.301137\H,3.340008,0.7741,1.295393\C,-4.178368,0.09  
144,0.367639\H,-4.703815,-0.819599,0.698489\H,-3.777044,0.565165,1.278  
086\C,4.157307,-0.405906,-0.336686\H,4.469374,-1.246657,0.303942\H,3.8  
00292,-0.849546,-1.279545\C,-5.168795,1.039133,-0.311053\H,-5.992571,1  
.312723,0.361454\H,-4.668424,1.965845,-0.626485\H,-5.604555,0.574995,-  
1.207412\C,5.356214,0.50223,-0.61471\H,6.178488,-0.049746,-1.088668\H,  
5.074651,1.327953,-1.283605\H,5.738802,0.943641,0.31675\H,2.082881,-1.  
401491,1.266782\H,-2.521186,-2.184573,0.403722\\Version=ES64L-G09RevD.  
01\HF=-616.0035318\S2=0.991131\S2-1=0.\S2A=0.049\RMSD=6.868e-09\RMSF=3  
.115e-06\Dipole=0.0825206,-0.2074871,0.335339\Quadrupole=6.6896555,-2.  
3402464,-4.3494092,0.367046,-0.5730417,-1.6044865\PG=C01 [X(C8H18O4)]\  
\@

#### TS1b (#Bu)

1\1\GINC-R476\FTS\UM11\6-31+G(d,p)\C8H18O4\ROOT\28-Dec-2015\0\#\ um11/  
6-31+G\*\* opt=(ts,calcfc,noegen,maxcyc=200) scf=maxcyc=200 # int=ultra  
fine freq=noraman guess=read geom=allcheck\TS for 2nd O-O cleavage (R =  
n-Bu)\0,1\H,1.6108368573,0.9308724927,0.988287175\C,2.0404056174,1.  
3067061969,0.0305349311\O,0.9272109162,1.514577036,-0.7441765854\O,-0.  
2506069969,-1.2952831958,-0.7752457552\O,0.0644650216,-1.1989027328,0.  
3835152696\O,-0.7434059387,0.1478800803,1.208906802\C,-1.7381506272,0.  
5787367761,0.3437015882\H,-1.3619721008,0.5215843356,-0.7006763176\C,3  
.0300483659,0.2881793236,-0.5366196318\H,2.4886069493,-0.6425725291,-0  
.7653041798\H,3.4245869573,0.6682544968,-1.4920374402\C,-3.0556096811,  
-0.1741009284,0.497207733\H,-2.8731416672,-1.2448068297,0.3071936186\H  
,-3.3958011972,-0.0918487281,1.5410233663\C,4.183259775,0.0108831323,0  
.4302159642\H,4.6910050298,0.9576116674,0.6764316412\H,3.7776225919,-0  
.3780305903,1.3781666292\C,-4.1324321923,0.3477637685,-0.4563967542\H,  
-4.2953982213,1.421811813,-0.2704656339\H,-3.7712752142,0.2656765893,-  
1.4941697414\C,5.1958417718,-0.9811885558,-0.1441038606\H,6.0164362286  
, -1.1746536602,0.5592665581\H,4.7145391891,-1.9425476989,-0.3738955317  
\H,5.6341807351,-0.5977296988,-1.0766731299\C,-5.4548471548,-0.4064402  
132,-0.3086166557\H,-6.2191759654,-0.0224683826,-0.9970676737\H,-5.319  
855943,-1.4773690801,-0.5178200352\H,-5.8459462397,-0.3147759151,0.714  
8787554\H,-1.8369967231,1.6635587221,0.5359346295\H,2.5283948563,2.269  
0483081,0.283545265\\Version=ES64L-G09RevD.01\State=1-A\HF=-615.996535  
9\S2=1.297267\S2-1=0.\S2A=1.869774\RMSD=7.125e-09\RMSF=6.174e-07\Dipol  
e=0.1392103,0.0207527,0.0442927\Quadrupole=5.8454196,-1.7809431,-4.064  
4765,0.1177673,0.9306692,1.1756064\PG=C01 [X(C8H18O4)]\@

#### int-2 (#Bu)

1\1\GINC-R47\Fopt\UM11\6-31+G(d,p)\C8H18O4\ROOT\10-Dec-2015\0\#\ um11/  
6-31+G\*\* opt=(maxcyc=200) scf=(maxcyc=200) # freq=noraman guess=read g  
eom=allcheck nosymm int=ultrafine\RO\* + 3O2 + RO\* caged complex (R =  
n-Butyl)\0,1\H,1.5004435705,0.8293717816,0.8374158664\C,1.971260073  
,1.1597798079,-0.118556647\O,0.8984338418,1.2884204758,-0.9628671631\O  
, -0.6600409628,-1.3219377403,-1.2551007387\O,-0.0400384734,-1.42338960  
25,-0.2371033085\O,-0.809732107,0.584456004,1.4879477201\C,-1.82683878  
59,0.9179812713,0.6272498728\H,-1.4037136535,1.0043430495,-0.396548729  
7\C,3.0282664533,0.1540695076,-0.5734201716\H,2.5397674172,-0.81631508  
49,-0.7507454391\H,3.4420343331,0.4845224992,-1.5392018858\C,-3.040426  
1903,-0.0066197328,0.6771984454\H,-2.6910385146,-1.0460227739,0.572680  
0154\H,-3.5135944337,0.0670841938,1.6686691878\C,4.1546421831,0.002958  
6661,0.4514666739\H,4.6105964458,0.9880306439,0.6425952622\H,3.7311231  
197,-0.3329991265,1.4116829849\C,-4.0517957839,0.3163222087,-0.4244256  
125\H,-4.3695096844,1.3682527758,-0.3364481133\H,-3.5566120929,0.22431

80859,-1.4050610791\c,5.2310084276,-0.9804817535,-0.0107378671\h,6.032  
4204309,-1.0823373298,0.7328655248\h,4.8018024117,-1.9778936804,-0.182  
9809283\h,5.6866348706,-0.6473959496,-0.9543648099\c,-5.2769065534,-0.  
5978221677,-0.376242931\h,-5.9905908935,-0.360908221,-1.1762802163\h,-  
4.9825243775,-1.6512644035,-0.4878003474\h,-5.8021501598,-0.4996883164  
,0.5846739351\h,-2.1012455633,1.9662352234,0.8803411417\h,2.4070996516  
,2.1538906881,0.1079693579\Version=ES64L-G09RevD.01\HF=-616.0102655\S  
2=1.995121\S2-1=0.\S2A=4.089958\RMSD=8.837e-09\RMSF=3.873e-06\Dipole=0  
.0071087,0.0774829,0.0213279\Quadrupole=5.8698314,-0.9668697,-4.902961  
8,-0.5221629,0.3546037,1.3442531\PG=C01 [X(C8H18O4)]\@\

### int-2\* (nBu; triplet)

1\1\GINC-R44\Fopt\UM11\6-31+G(d,p)\C8H18O4(3)\ROOT\10-Dec-2015\0\# um  
11/6-31+G\*\* opt=(maxcyc=200) scf=(maxcyc=200) # freq=noraman guess=rea  
d geom=allcheck nosymm int=ultrafine\RO\* + 3O2 + RO\* caged complex (R  
= n-Butyl)\0,3\h,1.2181129109,0.7311721064,0.6102790275\c,1.750951  
9827,1.0973345947,-0.3057593812\o,0.7571852692,1.2111704996,-1.2385208  
763\o,-0.8397414443,-1.3331819363,-1.3925089605\o,-0.1005164467,-1.510  
1854164,-0.4683311646\o,-0.6659188078,0.5639959863,1.7015511523\c,-1.6  
590975585,0.9388683467,0.8391367679\h,-1.1536619147,0.9806781589,-0.16  
09540574\c,2.8827386051,0.1403522529,-0.6762061148\h,2.4492569649,-0.8  
407895133,-0.9229966792\h,3.3765116,0.5103279435,-1.5885306096\c,-2.86  
58712236,0.0035973734,0.788426071\h,-2.5040236437,-1.0325278504,0.7043  
822856\h,-3.4116104326,0.0700769479,1.7427631824\c,3.9062112824,0.0016  
006429,0.4529449621\h,4.3068861293,0.9960168219,0.7085301279\h,3.40092  
2446,-0.370109117,1.3587721354\c,-3.7995621145,0.3391403306,-0.3764088  
098\h,-4.1196091654,1.3910727721,-0.2998819954\h,-3.2399240221,0.25441  
65852,-1.3222997985\c,5.0561759249,-0.9354812035,0.0804255239\h,5.7832  
714155,-1.0280301759,0.8978788175\h,4.6807658446,-1.9422003211,-0.1525  
85224\h,5.5909873522,-0.5665382987,-0.8066136942\c,-5.0274927411,-0.57  
14575661,-0.4173196718\h,-5.6863287154,-0.3242558051,-1.2600808627\h,-  
4.729268712,-1.6247270978,-0.5200970011\h,-5.6145626726,-0.4808481481,  
0.5079455344\h,-1.9454237784,1.994909776,1.0219900957\h,2.1214106659,2  
.1005623105,-0.0110607826\Version=ES64L-G09RevD.01\HF=-616.0109199\S  
2=2.98483\S2-1=0.\S2A=2.022768\RMSD=6.130e-09\RMSF=6.222e-06\Dipole=0.0  
001532,0.069853,0.0227667\Quadrupole=5.9301512,-0.4979305,-5.4322207,-  
0.2484846,-0.2650386,1.3440821\PG=C01 [X(C8H18O4)]\@\

### 3[nBuO•]2 (alkoxy radical dimer, triplet)

1\1\GINC-R91\Fopt\UM11\6-31+G(d,p)\C8H18O2(3)\ROOT\11-Jan-2016\0\# um  
11/6-31+g(d,p) opt=maxcyc=200 scf=maxcyc=200 freq=noraman int=ultrafin  
e iop(1/8=1)\RO\*--\*OR dimer caged complex (R = n-Butyl)\0,3\h,1.7735  
955548,2.1903584372,0.4008250723\c,1.707319048,1.6684528842,-0.5810036  
1\o,0.4529933578,1.9756947971,-1.0481975824\o,-0.295198553,1.480359609  
7,1.721401677\c,-1.5615847987,1.4499501039,1.1909111476\h,-1.580168181  
7,2.2962390491,0.4669252711\c,1.9840583989,0.1787128578,-0.402466254\h  
,1.2301441756,-0.2284044098,0.2882602684\h,1.8523664108,-0.3278530803,  
-1.37205806\c,-1.9369463783,0.1494208609,0.487038535\h,-1.2043136847,-  
0.0288208205,-0.3146626579\h,-1.8515392729,-0.6825942627,1.2043347948\  
c,3.3917738467,-0.0814810429,0.1381933304\h,4.1365517772,0.3606606447,  
-0.5438585548\h,3.509944475,0.4353153242,1.1043058415\c,-3.3525697866,  
0.1994796855,-0.0919046748\h,-4.0736409353,0.4123780083,0.7143866374\h  
, -3.4239571267,1.0390745027,-0.8021186836\c,3.678322675,-1.5734652826,  
0.3148468952\h,4.6895770108,-1.7483523726,0.70537332\h,2.9625423701,-2  
.0274811863,1.0148310984\h,3.5899874962,-2.1055458769,-0.6433722048\c,  
-3.7376261194,-1.102964041,-0.7952638477\h,-4.7537827148,-1.0551165877  
, -1.208625302\h,-3.0461676175,-1.3183138529,-1.6222818331\h,-3.6968056  
763,-1.9519122039,-0.0976104281\h,-2.2927078902,1.7365469305,1.9752962  
471\h,2.4666831392,2.1699503243,-1.2164324432\Version=ES64L-G09RevD.0  
1\State=3-A\HF=-465.7400609\S2=2.00579\S2-1=0.\S2A=3.00002\RMSD=3.099e  
-09\RMSF=2.776e-06\Dipole=-0.0087801,-0.2423174,-0.0451389\Quadrupole=  
4.9207419,-2.1226293,-2.7981126,0.1670682,-2.2021667,0.2157964\PG=C01  
[X(C8H18O2)]\@\

### TS-H (nBu)

1\1\GINC-R53\FTS\UM11\6-31+G(d,p)\C8H18O2(3)\ROOT\05-Jan-2016\0\# um1  
1/6-31+G(d,p) opt=(ts,calcf, noeigen,maxcyc=200) scf=maxcyc=200 freq=n  
oraman int=ultrafine\PES for H abstraction: nBuO\*--\*OnBu (diradical t  
riplet)\0,3\h,0.3755924257,-0.8988669759,0.0720780692\c,1.3592377677,  
-0.2983228006,0.3906889339\o,1.0680033017,0.7643928751,1.1593891753\o,  
-0.9320554343,-1.3008090356,-0.2568556536\c,-1.7285630433,-0.297081191  
5,0.2985671578\h,-1.3639470263,-0.0393054038,1.3136871975\c,-1.8244813  
298,0.9608066051,-0.5603001793\h,-2.2007707827,0.6840381438,-1.5577538  
583\h,-0.8090768088,1.3674046192,-0.7025514538\c,2.0931425123,0.100669  
7358,-0.9076370865\h,1.4770362355,0.8435668543,-1.4355642647\h,3.04642  
97715,0.5838927293,-0.6451702098\h,1.985751302,-1.0007346727,0.9809275  
199\h,-2.7287015899,-0.7506643517,0.4443492466\c,-2.7166706358,2.03037

69501,0.0722729109\H,-2.3231539732,2.2837827708,1.0698260653\H,-3.7260  
983888,1.6172079981,0.2319749532\C,-2.8073227387,3.2953687138,-0.78277  
41827\H,-3.2197485009,3.0683943376,-1.7765273866\H,-3.449200262,4.0549  
958655,-0.3170697099\H,-1.8120650782,3.7393632552,-0.9291209381\C,2.31  
22672184,-1.125570005,-1.7963978038\H,2.9254334954,-1.8637702017,-1.25  
56918858\H,1.3397772706,-1.6022274677,-1.9914151989\C,2.9911556279,-0.  
7518756589,-3.1150660885\H,3.9711732871,-0.2856497834,-2.9387895349\H,  
3.1475476331,-1.6360521992,-3.7465150134\H,2.3776267638,-0.038104186,-  
3.682963261\\Version=ES64L-G09RevD.01\State=3-A\HF=-465.7277101\|S2=2.0  
09662\|S2-1=0.\|S2A=2.000045\RMSD=3.114e-09\RMSF=9.533e-07\Dipole=0.4612  
255,0.1350692,-0.2109832\Quadrupole=4.565578,-3.5260857,-1.0394923,-3.  
4195556,-1.2689675,-1.347456\PG=C01 [X(C8H18O2)]\|@

===sec-Butyl===

#### <sup>s</sup>BuOH

1\1\GINC-R356\Fopt\UM11\6-31+G(d,p)\C4H10O1\ROOT\10-Jan-2016\0\|# um11  
/6-31+g(d,p) opt=maxcyc=200 scf=maxcyc=200 freq=noraman int=ultrafine\  
\ROH R = sec-butyl\|0,1\C,-0.5149200692,-0.1544269588,0.3917524649\H,-  
0.3854364406,-0.1470551725,1.4911621663\C,-0.8846102246,1.2496140258,-  
0.0803814745\H,-0.1358040129,1.9872761707,0.2378223368\H,-0.9594459245  
1,2.688203129,-1.1770967541\H,-1.8533200802,1.5624880571,0.3368987088\  
C,0.77001230448,-0.6775789132,-0.2437079077\H,0.9036169411,-1.176653028  
7,0.0897973128\H,0.6192533241,-0.7122278497,-1.3338909667\C,2.00276722  
65,0.1569935548,0.1060871163\H,2.9179142702,-0.3194335375,-0.268320446  
9\H,1.9524193131,1.1628193837,-0.3332680304\H,2.1089303682,0.270858894  
1,1.195472322\O,-1.5361490577,-1.0906494257,0.0419378063\H,-2.38274611  
85,-0.7905311928,0.3909320061\\Version=ES64L-G09RevD.01\State=1-A\HF=-  
233.5474852\|S2=0.\|S2-1=0.\|S2A=0.\RMSD=9.334e-09\RMSF=4.574e-06\Dipole=  
-0.0321792,0.6091336,0.3410544\Quadrupole=2.3310044,-2.3142921,-0.0167  
122,-1.6898215,-1.5834176,-0.4901306\PG=C01 [X(C4H10O1)]\|@

#### ketone

1\1\GINC-R3196\Fopt\RM11\6-31+G(d,p)\C4H8O1\ROOT\17-Dec-2015\0\|# m11/  
6-31+g(d,p) freq opt=maxcyc=200 scf=maxcyc=200 int=ultrafine\|s-Bu ket  
one (singlet)\|0,1\O,-0.6970427532,0.0132954407,0.0554959208\C,-1.6779  
215345,0.7287931845,0.107632897\C,-3.0551212299,0.211337919,-0.2748149  
59\H,-3.610584112,0.0546656525,0.6647689438\H,-2.9154553912,-0.7708181  
247,-0.7424101117\C,-1.5763647103,2.1711262713,0.5630066868\H,-0.60659  
16611,2.3355274447,1.0424899261\H,-1.6622714199,2.8341620006,-0.310452  
3326\H,-2.3949781799,2.427636461,1.249893391\C,-3.8396511417,1.1656814  
168,-1.1826177608\H,-4.8027854994,0.7219083931,-1.4637157071\H,-4.0474  
483985,2.1222293906,-0.6842856335\H,-3.2862779584,1.3770595398,-2.1080  
512509\\Version=ES64L-G09RevD.01\State=1-A\HF=-232.3430138\RMSD=2.823e  
-09\RMSF=1.534e-05\Dipole=-1.0963862,0.7577464,0.0101126\Quadrupole=-2  
.0677957,0.289013,1.7787827,3.047521,-0.2114939,0.540768\PG=C01 [X(C4H  
8O1)]\|@

#### ketone\* (triplet)

1\1\GINC-R183\Fopt\UM11\6-31+G(d,p)\C4H8O1(3)\ROOT\11-Jan-2016\0\|# um  
11/6-31+g(d,p) freq opt=maxcyc=200 scf=maxcyc=200 int=ultrafine\|s-Bu  
ketone (triplet)\|0,3\O,-0.8309336432,-0.0571375255,0.5177390489\C,-1.  
6376908664,0.8104444624,-0.0654460314\C,-3.0143972854,0.2196641968,-0.  
3612779276\H,-3.5210587209,0.0021804504,0.5969354182\H,-2.872603658,-0.  
7422357365,-0.8723581299\C,-1.5524720687,2.1969053412,0.545460236\H,-  
0.5061351896,2.4877662751,0.6934658013\H,-2.0224308859,2.9191465795,-0.  
1325310414\H,-2.0675032063,2.2321237999,1.5217603204\C,-3.8693701134,  
1.1547308721,-1.2170022776\H,-4.8120000538,0.6627667154,-1.4895676744\  
H,-4.1211343794,2.077786076,-0.6780589238\H,-3.344763929,1.4284634931,  
-2.1421788186\\Version=ES64L-G09RevD.01\State=3-A\HF=-232.2176839\|S2=2  
.004741\|S2-1=0.\|S2A=2.000012\RMSD=2.215e-09\RMSF=8.993e-06\Dipole=-0.6  
756495,0.4855923,-0.082131\Quadrupole=-0.7096326,0.6847553,0.0248773,2  
.1451436,0.080024,1.2369378\PG=C01 [X(C4H8O1)]\|@

#### <sup>s</sup>BuO<sup>s</sup>Bu

1\1\GINC-R41\Fopt\RM11\6-31+G(d,p)\C8H18O2\ROOT\07-Jan-2016\0\|# m11/6  
-31+g(d,p) opt=maxcyc=200 scf=maxcyc=200 freq=noraman int=ultrafine\|s  
BuO<sup>s</sup>Bu\|0,1\C,0.3210811962,2.9072091238,-0.0802202944\H,1.0887995333,  
3.5155652135,0.421685929\H,-0.6142016101,3.0461396735,0.4849692958\C,0.  
7375060457,1.4434916519,0.0423021483\H,1.6243549575,1.2506113719,-0.5  
865073126\O,-0.352908929,0.6994870865,-0.518062381\O,0.0884579202,-0.6  
481719536,-0.657077046\C,-0.8581963139,-1.4843508715,0.0231883038\H,-0.  
9501836152,-1.1089134057,1.0590866177\C,-0.228241803,-2.8747274057,0.  
0241411889\H,-0.9623883948,-3.5733594446,0.4516800923\H,-0.069746246,-  
3.1794440532,-1.0220997496\C,1.0060012157,1.0199359263,1.4809906609\H,  
1.2473119035,-0.0498276203,1.5299973243\H,1.8544645711,1.5834399233,1.  
8930436989\H,0.1208767271,1.2153368533,2.1038850245\C,0.1431070376,3.3

600134202,-1.529767299\H,-0.6303755604,2.7637419872,-2.0292565681\H,-0.1465003465,4.4177978513,-1.5815333961\H,1.0785951694,3.2378966487,-2.0946074892\C,-2.2098013022,-1.443347144,-0.677114949\H,-2.9398898168,-2.0603746794,-0.1352172297\H,-2.5842900097,-0.4139243913,-0.7242753191\H,-2.1125443041,-1.8295374951,-1.7014108232\C,1.0854424369,-2.9378875702,0.8041600476\H,1.5004247746,-3.954300391,0.8021000056\H,1.8308394933,-2.2628640996,0.3635547249\H,0.9328987895,-2.6396358461,1.8523709145\\Version=ES64L-G09RevD.01\State=1-A\HF=-465.8108898\RMSD=3.087e-09\RMSF=2.707e-06\Dipole=0.0612175,-0.0373136,0.5369287\Quadrupole=-0.4306026,2.6171029,-2.1865003,2.0897958,-0.1425244,0.0871668\PG=C01 [X(C8H1802)]\@

**SBuO•**

1\1\GINC-CA116\Fopt\UM11\6-31+G(d,p)\C4H9O1(2)\ROOT\11-Sep-2015\0\#\um11/6-31+g(d,p) opt=maxcyc=200 scf=maxcyc=200 freq=noraman int=ultrafine\ROO\* R = sec-butyl\0,2\O,-1.2399299902,0.6548679264,0.5043240277\C,-2.4129245424,0.3163550469,-0.1356845237\H,-2.040686214,-0.0812347467,-1.110127599\C,-3.2952855083,1.5376148737,-0.413071274\H,-4.1075120595,1.2944046693,-1.1101859312\H,-3.7403279488,1.8997744921,0.5246765897\H,-2.6887786323,2.343084305,-0.8440353657\C,-3.1316098013,-0.8341751663,0.5907113761\H,-2.3999402237,-1.6398516866,0.7419969725\H,-3.4232633881,-0.4748114699,1.5896480817\C,-4.3575961578,-1.3511191012,-0.1637800708\H,-4.7741720768,-2.2384765475,0.3298099617\H,-5.1533592689,-0.5955794934,-0.2114301221\H,-4.098930798,-1.6337619116,-1.1953616229\\Version=AS64L-G09RevD.01\State=2-A\HF=-232.8708187\S2=0.752955\S2-1=0.\S2A=0.750006\RMSD=1.183e-09\RMSF=1.036e-05\Dipole=-0.7768931,-0.2757121,-0.4042765\Quadrupole=-2.4757512,1.0840504,1.3917009,-1.2315941,-1.8301948,-0.381845\PG=C01 [X(C4H9O1)]\@

**SBuOO•**

1\1\GINC-CA037\Fopt\UM11\6-31+G(d,p)\C4H9O2(2)\ROOT\11-Sep-2015\0\#\um11/6-31+g(d,p) opt=maxcyc=200 scf=maxcyc=200 freq=noraman int=ultrafine\ROO\* R = sec-butyl\0,2\O,-0.3583515348,-0.2247882398,0.6181171238\O,-1.2749997706,0.6974048916,0.595368903\C,-2.4468071216,0.277515062,-0.1769252767\H,-2.0502126235,-0.1083176783,-1.1285516102\C,-3.2642298724,1.539247408,-0.3836365643\H,-4.1085196363,1.3348963618,-1.0536472176\H,-3.6583251592,1.9031945965,0.57519769\H,-2.64952723,2.3284413286,-0.8336681906\C,-3.1632489438,-0.8291616159,0.5895853562\H,-2.4338636512,-1.6280239387,0.782519273\H,-3.4791872861,-0.4288905389,1.5654159945\C,-4.3653456225,-1.381270027,-0.1794572677\H,-4.7978718996,-2.2426252518,0.3446152329\H,-5.1585853133,-0.6295274581,-0.2902610226\H,-4.0722483452,-1.7161388802,-1.1852844237\\Version=AS64L-G09RevD.01\State=2-A\HF=-308.0157915\S2=0.752967\S2-1=0.\S2A=0.750005\RMSD=7.142e-09\RMSF=1.898e-05\Dipole=-1.1943668,-0.0067719,-0.4748962\Quadrupole=-3.0937423,1.6748875,1.4188549,-0.0802618,-1.5984047,-0.7323339\PG=C01 [X(C4H9O2)]\@

**TScomb (SBu)**

1\1\GINC-R3175\FTS\UM11\6-31+G(d,p)\C8H18O4\ROOT\09-Dec-2015\0\#\um11/6-31+g(d,p) opt=(ts,calcf,oeigen,maxcyc=200) scf=maxcyc=300 # freq=noraman guess=read geom=allcheck nosymm iop(1/8=1) int=ultrafine\TS for ROO-OOR symmetric O-O bond cleavage (R = iso-Bu)\0,1\H,-1.7268441762,-0.2682468454,-1.0034946998\C,-1.9955537151,0.2133007935,-0.0499287101\O,-0.8880186457,-0.0881214121,0.8553704023\O,-0.552662539,-1.3582095091,0.7556709223\O,0.5526652939,-1.3581828488,-0.7557194188\O,0.8880152468,-0.0880899695,-0.8553785186\C,1.9955478295,0.2133091621,0.0499313387\H,1.7268395582,-0.2682699039,1.0034818105\C,2.0057855139,1.7241655723,0.1841566497\H,2.8049053082,2.037722365,0.8674949615\H,2.1778958441,2.1967131811,-0.7933209863\H,1.0482192021,2.0731337758,0.5907473879\C,-2.0057992212,1.7241614057,-0.1841061359\H,-2.8049212511,2.0377358421,-0.8674337331\H,-2.1779110747,2.1966771016,0.7933866607\H,-1.0482350897,2.0731474064,-0.5906866564\C,-3.2746860478,-0.3937424272,0.5165934589\H,-3.0741014873,-1.4544857429,0.7232078751\H,-3.4998915365,0.0920931814,1.4789014339\C,3.274683846,-0.3937098337,-0.5166084273\H,3.0741045713,-1.4544475114,-0.7232569227\H,3.4998885002,0.0921575355,-1.4789005651\C,-4.4589105618,-0.260546909,-0.4433284474\H,-5.3375134294,-0.7895364094,-0.0529324416\H,-4.7467685732,0.7888066508,-0.5949667931\H,-4.219499419,-0.6913893368,-1.4263893698\C,4.4589062484,-0.2605393903,0.4433195676\H,5.3375121573,-0.789512557,0.052908256\H,4.7467592577,0.7888106604,0.5949916675\H,4.2194953901,-0.6914140271,1.4263664332\\Version=ES64L-G09RevD.01\HF=-616.0303365\S2=0.375678\S2-1=0.\S2A=0.003879\RMSD=7.665e-09\RMSF=1.691e-06\Dipole=-0.0000031,0.9215532,0.0000155\Quadrupole=7.147088,-3.3065004,-3.8405876,0.0000101,0.7563738,0.0000052\PG=C01 [X(C8H18O4)]\@

**SBuO4SBu**

1\1\GINC-R243\Fopt\RM11\6-31+G(d,p)\C8H18O4\ROOT\29-Aug-2015\0\#\m11/

6-31+G\*\* opt=maxcyc=200 scf=maxcyc=200 # int=ultrafine freq=noraman\R  
O4R R=sec-butyl\0,1\H,2.0297760242,-0.312902657,1.2005335678\C,2.4479  
980816,0.0990005209,0.2666277446\O,1.3317064138,0.5106691717,-0.556277  
3923\O,0.4477923753,-0.5662873252,-0.6979889197\O,-0.3333477352,-0.628  
5901862,0.469670313\O,-1.2800703112,0.4009016701,0.3983348049\C,-2.371  
5182946,-0.0206812529,-0.4524069656\H,-1.9313843247,-0.3437444218,-1.4  
108777657\C,-3.1943656432,1.2425753292,-0.6528263934\H,-4.0053050125,1  
.0571510955,-1.3682025705\H,-3.6343988634,1.5663248899,0.3007516841\H,  
-2.56304734,2.0504229378,-1.0419981898\C,3.194579529,1.3928140194,0.55  
25009199\H,4.0166147576,1.2086692918,1.2554352872\H,3.6125616697,1.805  
1217181,-0.3765024409\H,2.5170963742,2.1338520301,0.9935382515\C,3.283  
4043579,-0.9548381499,-0.4561526173\H,2.6196176628,-1.7828210492,-0.74  
15540293\H,3.6683469584,-0.5114083109,-1.3876417705\C,-3.1412658015,-1  
.168240375,0.1968124263\H,-2.4288181144,-1.9724664879,0.4275945323\H,-  
3.5499948879,-0.1626318973,1.1550758961\C,4.4333849658,-1.4820371212,0.  
4052684172\H,4.9489922197,-2.3115486251,-0.0951258466\H,5.1812340715,-  
0.7032747819,0.6080872305\H,4.0639773812,-1.8546493859,1.3722250764\C,  
-4.2596149191,-1.7042426908,-0.7000928667\H,-4.7239188701,-2.594522882  
6,-0.2571963597\H,-5.05289046,-0.9595576579,-0.8518906175\H,-3.8706876  
345,-1.9888154398,-1.6890629663\Version=ES64L-G09RevD.01\State=1-A\HF  
=-616.0464747\RMSD=9.863e-09\RMSF=4.392e-06\Dipole=0.0072846,-0.244470  
1,-0.0081702\Quadrupole=6.6760426,-3.0351996,-3.640843,0.2104136,2.371  
8752,0.0908626\PG=C01 [X(C8H18O4)]\@

**TS1a (\$Bu)**

1\1\GINC-R43\FTS\UM11\6-31+G(d,p)\C8H18O4\ROOT\31-Aug-2015\0\#\ um11/6  
-31+g(d,p) opt=(ts,calcf, noeigen,maxcyc=200) scf=maxcyc=300 # freq=no  
raman guess=mix nosymm iop(1/8=1)\TS for single RO--O bond cleavage (R  
= iso-butyl)\0,1\C,-2.0244983762,-0.4446857878,-0.138858103\O,-0.80  
89586408,-1.0410396134,-0.635793475\O,-0.0737544831,-0.128011292,-1.49  
99026552\O,-0.1626318973,1.0791863436,-1.1168200464\O,0.9245768512,1.2  
692060913,0.4904484665\C,2.049883795,0.4806946133,0.2462107268\C,2.756  
4124263,0.4117200468,1.6131562017\H,3.6064040058,-0.2792697865,1.54932  
93579\H,3.1233222886,1.4064617708,1.8991444298\H,2.0650771328,0.050426  
2163,2.3834055021\C,-2.5407733102,-1.4946980052,0.8377103719\H,-3.4131  
373362,-1.1016124783,1.3741512766\H,-2.8347776476,-2.4086163491,0.3036  
934081\H,-1.7666647857,-1.7457100146,1.5727971186\C,-2.9871531793,-0.1  
409770852,-1.286111281\H,-2.490314101,0.5336717959,-1.9977407895\H,-3.  
194222699,-1.0809567122,-1.8206157262\C,2.9357223817,1.0672600536,-0.8  
561103469\H,2.3150512188,1.1899019555,-1.755618145\H,3.2467876834,2.07  
65960567,-0.5451927181\H,1.7306450932,-0.5458493739,-0.0227156394\H,-1  
.7565879773,0.4735585001,0.4059165011\C,-4.2870983807,0.5021822411,-0.  
7969142532\H,-4.909777911,0.8164425403,-1.6439793517\H,-4.8822748417,-  
0.1935278223,-0.1900034477\H,-4.0805376513,1.3937157528,-0.1866858353\  
C,4.1508198204,0.1937098637,-1.1736352324\H,4.6858607219,0.5690945499,  
-2.0554084426\H,4.8664853972,0.1699479329,-0.3401800346\H,3.8459594021  
,-0.8421150039,-1.3860028382\Version=ES64L-G09RevD.01\HF=-616.0088217  
\S2=0.621733\S2-1=0.\S2A=0.012683\RMSD=8.214e-09\RMSF=3.618e-06\Dipole  
=-0.2774814,-0.3921716,0.19769\Quadrupole=6.4153226,-4.8971905,-1.5181  
321,0.6329064,0.7188308,-1.2213802\PG=C01 [X(C8H18O4)]\@

**int-1 (\$Bu)**

1\1\GINC-R1523\Fopt\UM11\6-31+G(d,p)\C8H18O4\ROOT\31-Aug-2015\0\#\ um1  
1/6-31+G\*\* opt=(maxcyc=200) scf=(maxcyc=200) # freq=noraman guess=mix  
nosymm\ROO\* + RO\* caged complex (R = iso-Butyl)\0,1\H,-1.5996045071  
,-0.8227524648,0.9063610412\C,-1.914544697,-1.233690216,-0.0736191351\  
O,-0.8003225448,-1.4924815845,-0.8458798099\O,0.1151645724,1.228152688  
3,-0.1770479103\O,0.2526136006,1.073639686,1.0607276797\O,0.8144493502  
,-0.2286184852,1.4248360299\C,1.85480724,-0.6307701246,0.5083715877\H,  
1.447467466,-0.5950736542,-0.512194728\C,-2.8901381324,-0.2829272137,-  
0.776476711\H,-2.3268837021,0.618996107,-1.0582907191\H,-3.2230328089  
,-0.7582649734,-1.7131238646\C,3.0700400663,0.2829441462,0.6533617967\  
H,2.7491673399,1.3216366499,0.4829491343\H,3.4318756622,0.2227075174,1  
.6913082652\C,-4.0834702909,0.0996258241,0.0993822417\H,-4.7451954497,  
-0.7570343582,0.2884554905\H,-3.7483533864,0.4888208116,1.0724023547\C  
,4.18443893,-0.0758661176,-0.3324811732\H,4.621597298,-1.0588638065,-0  
.1107098033\H,3.8041238893,-0.0997726364,-1.3641682734\H,-4.687236855,  
0.88107489,-0.3794855953\H,4.9953002112,0.662432963,-0.2926232995\C,2.  
1005994261,-2.0831464506,0.8947614525\H,2.8389898294,-2.5263895174,0.2  
150715718\H,2.4774222505,-2.1545237298,1.9243710373\H,1.1652168719,-2.  
6491583067,0.8069739796\C,-2.5294751842,-2.6305957051,0.189412637\H,-3  
.3846376045,-2.5191862554,0.8671748804\H,-2.8691665104,-3.0755640581,-  
0.7547914079\H,-1.7910193306,-3.2923966254,0.6570952104\Version=ES64L  
-G09RevD.01\HF=-616.0144233\S2=1.002629\S2-1=0.\S2A=0.050556\RMSD=2.54  
7e-09\RMSF=6.715e-06\Dipole=0.040061,-0.4041552,0.2048713\Quadrupole=6  
.0289805,-1.2056745,-4.8233059,1.0428023,-0.063424,-1.3713651\PG=C01 [X  
(C8H18O4)]\@

**TS2 (\$Bu)**

```
1\1\GINC-R200\Fts\UM11\6-31+G(d,p)\C8H18O4\ROOT\09-Sep-2015\0\#\ um11/
6-31+G(d,p) opt=(calcfrc,ts,noeigen,maxcyc=200) freq=noraman # guess=mi
x int=ultrafine scf=maxcyc=200 nosymm\TS for 2nd O-O bond cleavage (R
= sec-butyl)\0,1\H,1.5600567502,0.9139120051,0.9160406003\C,2.056346
5983,1.3313786957,0.0065314527\O,0.985612765,1.4634429531,-0.849190542
7\O,-0.2996049539,-1.2743100171,-0.7806079417\O,0.0237263697,-1.184356
7128,0.3769085353\O,-0.7320040679,0.1813420195,1.2132023076\C,-1.72535
39249,0.6699400708,0.3607807934\H,-1.3464181883,0.6079578986,-0.681444
3857\C,3.0517285262,0.2768175535,-0.5105031587\H,2.4772183722,-0.62404
50659,-0.7689177187\H,3.4944297966,0.6530209117,-1.4459240245\C,-3.021
3934027,-0.134993696,0.4952449876\H,-2.7728788641,-1.198742257,0.35820
57567\H,-3.3905853169,-0.0275760798,1.5269385707\C,4.1506137372,-0.056
554653,0.4995571793\H,4.8098942303,0.8030722598,0.6811498567\H,3.72002
57821,-0.3621700317,1.4646873591\C,-4.0934935821,0.2824796163,-0.51267
0455\H,-4.4547120157,1.3024782732,-0.322656138\H,-3.7008532137,0.25054
48887,-1.5399040303\C,-1.8670754007,2.1612176193,0.6998453255\H,-2.577
858704,2.6323052845,0.0091386875\H,-2.2337781285,2.2861404838,1.727598
1391\H,-0.8950024212,2.6577193734,0.5943869392\C,2.6877790734,2.680084
1834,0.3632284411\H,3.3898744324,2.5829193017,1.2012844805\H,3.2327765
268,3.08419865,-0.501925331\H,1.9036825379,3.3938754997,0.6451304574\H
,4.7770710282,-0.8815898227,0.1367859923\H,-4.9613179919,-0.3878967761
,-0.4666328655\version=ES64L-G09RevD.01\HF=-616.0067408\s2=1.30472\s2
-1=0.\s2A=1.905886\RMSD=8.110e-09\RMSF=2.132e-06\Dipole=0.1595045,0.15
11007,0.099674\Quadrupole=5.3174276,-1.0189903,-4.2984374,0.1025268,0.
4650807,1.4256228\PG=C01 [X(C8H18O4)]\@\
```

**int-2 (\$Bu)**

```
1\1\GINC-R54\Fopt\UM11\6-31+G(d,p)\C8H18O4\ROOT\09-Dec-2015\0\#\ um11/
6-31+G** opt=(maxcyc=200) scf=(maxcyc=200) # freq=noraman guess=read g
eom=allcheck nosymm int=ultrafine\RO* + 3O2 + RO* caged complex (R =
sec-Butyl)\0,1\H,-1.3852447251,-0.0816118914,-0.6756910753\C,-1.87420
445,0.4033547954,0.1924790645\O,-0.9614333486,0.5022270428,1.221681257
3\O,-0.0206516632,-2.0995905948,0.6934712407\O,0.0573351141,-2.1431627
894,-0.5001438264\O,0.9339454609,0.4369566975,-1.217506686\C,1.8503489
472,0.4341107623,-0.1867932082\H,1.3758346845,-0.0008560744,0.71521496
98\C,-3.1398672889,-0.3497555227,0.6147581102\H,-2.8227587552,-1.31543
51609,1.037646419\H,-3.6244577048,0.208400589,1.4305963227\C,3.1340591
571,-0.3144408209,-0.5595979567\H,2.8409515241,-1.3165018039,-0.908783
0246\H,3.6006803258,0.1947910671,-1.416836154\C,-4.1118741599,-0.58318
76003,-0.5430008942\H,-4.5527858956,0.3567922256,-0.9022884914\H,-3.60
38045406,-1.0622409939,-1.3932941123\C,4.1161364195,-0.4370310904,0.60
67155891\H,4.5343908354,0.5377236832,0.892956498\H,3.6237396502,-0.864
4750197,1.4929924405\H,-4.9383780672,-1.2376754192,-0.2377428337\H,4.9
578692838,-1.0913618072,0.3460211729\C,2.0794541609,1.9305895033,0.136
0279196\H,2.7797765948,2.0101747619,0.9764197576\H,2.4999821755,2.4473
491402,-0.7366341838\H,1.1289029948,2.3958436438,0.4220485221\C,-2.140
7823532,1.8666995738,-0.2360372789\H,-2.8394143314,1.868226902,-1.0815
757252\H,-2.5781514512,2.4327862601,0.5968225088\H,-1.2015195937,2.335
4519411,-0.5519363424\version=ES64L-G09RevD.01\HF=-616.0205448\s2=1.9
88844\s2-1=0.\s2A=4.078779\RMSD=4.561e-09\RMSF=8.815e-06\Dipole=0.0013
893,0.1086827,-0.0056518\Quadrupole=5.0479506,0.8975607,-5.9455112,0.1
067184,1.6373947,-0.2240834\PG=C01 [X(C8H18O4)]\@\
```

**int-2\* (\$Bu, triplet)**

```
1\1\GINC-R44\Fopt\UM11\6-31+G(d,p)\C8H18O4(3)\ROOT\11-Dec-2015\0\#\ um
11/6-31+G** opt=(maxcyc=200) scf=(maxcyc=200) # freq=noraman guess=rea
d geom=allcheck nosymm int=ultrafine\RO* + 3O2 + RO* caged complex (R
= sec-Butyl; triplet)\0,3\H,-1.3725752403,-0.1810081463,-0.652572610
8\C,-1.8540054229,0.372780444,0.1782425081\O,-0.956917281,0.4998709553
,1.2176141182\O,-0.2178972278,-2.2090579868,0.932888385\O,0.0626885427
,-2.261033296,-0.2296995822\O,0.9367315737,0.5309083667,-1.2359381752\C
,1.8407261458,0.4444581136,-0.1988436545\H,1.3805882233,-0.0932157975
,0.6528068781\C,-3.1569686419,-0.3010762721,0.6223842143\H,-2.88864784
42,-1.2502912192,1.1108581224\H,-3.6307949145,0.3273733261,1.392074462
5\C,3.1510709814,-0.2185755545,-0.6393120198\H,2.8947207838,-1.1890996
449,-1.0905923717\H,3.6017569452,0.3929580655,-1.4359021094\C,-4.11849
68764,-0.5669005498,-0.537142127\H,-4.5138095676,0.3656318996,-0.96262
5824\H,-3.61710909,-1.1189273072,-1.3461110471\C,4.1319966783,-0.42679
79255,0.5156547081\H,4.5149950491,0.5269109653,0.9038024559\H,3.651656
8306,-0.9601278898,1.3495264346\H,-4.9765139259,-1.1666060002,-0.20730
84543\H,4.9967328827,-1.021552272,0.1945315521\C,2.0254757726,1.909995
2302,0.2676890061\H,2.7191880451,1.9245176449,1.1172257908\H,2.4357067
446,2.5188919914,-0.5485237566\H,1.061456074,2.318491546,0.5927751024\C
,-2.0573522739,1.8192873385,-0.3362466237\H,-2.7481995436,1.797982905
,-1.1879508591\H,-2.480380952,2.447601614,0.4585406764\H,-1.0977434708
```

,2.2307614556,-0.6698551995\\Version=ES64L-G09RevD.01\\HF=-616.0199948\\S2=3.000984\\S2-1=0.\\S2A=2.023121\\RMSD=3.744e-09\\RMSF=4.250e-06\\Dipole=0.0166025,0.0479857,-0.0040817\\Quadrupole=5.0699636,0.821446,-5.8914096,0.0891094,1.7512467,-0.0284973\\PG=C01 [X(C8H18O4)]\\@

### <sup>3</sup>[<sup>t</sup>BuO•]<sub>2</sub> (alkoxyl radical dimer, triplet)

1\\1\\GINC-R89\\FOpt\\UM11\\6-31+G(d,p)\\C8H18O2(3)\\ROOT\\11-Jan-2016\\0\\# um11/6-31+g(d,p) opt=maxcyc=200 scf=maxcyc=200 freq=noraman int=ultrafine nosymm\\RO\*--\*OR dimer caged complex (R = sec-Butyl)\\0,3\\H,-1.2470506086,-0.1744417042,-0.449275267\\C,-1.8112345486,0.4827236027,0.242912814\\O,-0.9999195593,0.8654246378,1.2884439694\\O,0.9718095795,0.7998728948,-1.3220253184\\C,1.7870512693,0.510324846,-0.2499158418\\H,1.2355509008,-0.1109930816,0.4843693739\\C,-3.096950117,-0.1948895337,0.7347220187\\H,-2.8071066302,-1.0320624336,1.3867897586\\H,-3.6468910886,0.5218531849,1.3634013129\\C,3.0912019884,-0.1679229652,-0.6896321201\\H,2.8247162486,-1.35070869535,-1.2799126485\\H,3.6246023387,0.5154136289,-1.3678052123\\C,-3.9744141471,-0.7074712209,-0.4085722487\\H,-4.3991282406,0.1164786871,-0.9979479271\\H,-3.3975448489,-1.347552512,-1.0926606339\\C,3.9779172701,-0.5740117013,0.4887845436\\H,4.3839943878,0.3009071846,1.0142761735\\H,3.4141241646,-1.1730997822,1.2193607858\\H,-4.8124652136,-1.3026691447,-0.0238260566\\H,4.8291650155,-1.178180098,0.1497030661\\C,2.0281351771,1.8843312612,0.425989563\\H,2.6167662396,1.7277427202,1.3382114758\\H,2.577840209,2.5462629987,-0.2558303876\\H,1.0687388067,2.3364270356,0.7007531852\\C,-2.088359045,1.8007910757,-0.5243420168\\H,-1.3674194872,1.5677776014,-1.4219648529\\H,-2.6537460847,2.4934182606,0.1126820437\\H,-1.1412879762,2.2575385107,-0.8320265526\\Version=ES64L-G09RevD.01\\HF=-465.7486864\\S2=2.006041\\S2-1=0.\\S2A=2.000022\\RMSD=1.507e-09\\RMSF=2.890e-06\\Dipole=-0.0014369,-0.2304329,0.0109288\\Quadrupole=5.2332708,0.2681685,-5.5014393,0.1228189,1.9206178,-0.1787032\\PG=C01 [X(C8H18O2)]\\@

### TS-H (<sup>s</sup>Bu)

1\\1\\GINC-R48\\FTS\\UM11\\6-31+G(d,p)\\C8H18O2(3)\\ROOT\\05-Jan-2016\\0\\# um11/6-31+g(d,p) opt=(ts,calcf, noeigen,maxcyc=200) scf=maxcyc=200 freq=noraman int=ultrafine\\PES for H abstraction: sBuO\*--\*OsBu (diradical triplet)\\0,3\\H,0.3286201465,-0.7363912634,-0.2359066691\\C,1.2931109684,-0.2041575822,0.214436472\\O,0.9411686077,0.8981376399,0.9140451581\\O,-0.9785285062,-1.3090953904,-0.3615071715\\C,-1.7870200349,-0.361375647,0.2791762177\\H,-1.3334448217,-0.0997410991,1.2586566627\\C,-1.9348976306,0.9168366589,-0.5544494088\\H,-2.5347569469,0.6853775694,-1.4488040418\\H,-0.9324972596,1.2022656126,-0.9099647186\\C,2.2302295689,0.1568532724,-0.9582389286\\H,2.3406681683,-0.7523464199,-1.5668201608\\H,1.7123476026,0.8995439529,-1.5817463098\\C,1.8869660816,-1.2220455086,1.2084880812\\H,1.1189767099,-1.5285922754,1.9285579911\\H,2.2131810501,-2.1032141079,0.6415003083\\H,2.7380510378,-0.7857468996,1.7463193221\\C,3.5884418127,0.6908264935,-0.5018357393\\H,4.1848853671,-0.0908793097,-0.0124426134\\H,4.16442981,1.0593116595,-1.360419202\\H,3.4600843702,1.520077605,0.2065297256\\C,-3.1295194242,-1.0583288151,0.5491458139\\H,-2.9758095679,-1.9617618054,1.1511375517\\H,-3.8046205389,-0.3815919262,1.0891814182\\H,-3.5985184188,-1.3438239493,-0.402149491\\C,-2.5421591325,2.0762589337,0.2355257407\\H,-2.5878168618,2.9901672336,-0.3710050008\\H,-3.5647117834,1.8525029229,0.5710412368\\H,-1.9318213744,2.2935509695,1.1246711552\\Version=ES64L-G09RevD.01\\State=3-A\\HF=-465.7390295\\S2=2.009432\\S2-1=0.\\S2A=2.000043\\RMSD=6.884e-09\\RMSF=4.701e-07\\Dipole=0.5458192,0.0510773,0.0601102\\Quadrupole=4.2800437,-3.4033704,-0.8766732,-2.3079451,-1.6704393,-2.890102\\PG=C01 [X(C8H18O2)]\\@

===tert-Butyl===

### <sup>t</sup>BuO•

1\\1\\GINC-CA037\\FOpt\\UM11\\6-31+G(d,p)\\C4H9O1(2)\\ROOT\\11-Sep-2015\\0\\# um11/6-31+g(d,p) opt=maxcyc=200 scf=maxcyc=200 freq=noraman int=ultrafine\\RO\* R = tert-butyl\\0,2\\C,0.0000000002,-0.0254230468,0.07769654\\C,-0.0000000993,1.3803491544,-0.5807609081\\H,0.8947850238,1.9413632647,-0.2849322166\\H,0.000000868,1.2470026309,-1.6710335675\\H,-0.8947854986,1.9413629624,-0.2849324965\\C,-1.2721296909,-0.7896551961,-0.3129632956\\H,-1.3013396376,-0.9618831762,-1.398042168\\H,-1.2989519906,-1.7641614364,0.1929370321\\H,-2.161068979,-0.2185068046,-0.0159598592\\C,1.2721298047,-0.7896550668,-0.3129633713\\H,2.161068946,-0.2185064961,-0.0159598332\\H,1.2989521712,-1.764161332,0.1929368181\\H,1.3013398534,-0.9618826623,-1.3980423\\O,0.00000001,0.2637932049,1.4316896257\\Version=AS64L-G09RevD.01\\State=2-A\\HF=-232.8766948\\S2=0.752925\\S2-1=0.\\S2A=0.750006\\RMSD=7.326e-09\\RMSF=2.478e-05\\Dipole=0.,-0.084354,-0.8916558\\Quadrupole=0.7140784,1.500746,-2.2148243,-0.0000002,-0.0000001,-0.8846799\\PG=C01 [X(C4H9O1)]\\@



**†Bu00•**

1\1\GINC-CA116\Fopt\UM11\6-31+G(d,p)\C4H9O2(2)\ROOT\11-Sep-2015\0\#\ u  
m11/6-31+g(d,p) opt=maxcyc=200 scf=maxcyc=200 freq=norman int=ultrafi  
ne\ROO\* R = tert-butyl\0,2\o,0.6716318021,-0.1656402164,0.2137349369  
\o,1.6425938833,-0.2994630067,-0.6382752364\C,2.97230648,-0.06864538,-  
0.0262910267\C,3.9298116045,-0.2760884985,-1.1907125627\H,4.9628182807  
, -0.1279842454, -0.8493522686\H,3.8356300316,-1.2937436822,-1.591772118  
8\H,3.7203848124,0.4406778596,-1.9955277065\C,3.163962707,-1.100560395  
3,1.0776928365\H,4.1590004792,-0.9778656312,1.5261165861\H,2.404691983  
, -0.9671742307,1.8580118152\H,3.0846135639,-2.1180941377,0.6722620574\  
C,3.0005609526,1.3586090576,0.5052233509\H,3.9895969241,1.5716299326,0  
.9326201063\H,2.8059858551,2.075206923,-0.3038955221\H,2.2415646884,1.  
4878646476,1.2865038852\Version=AS64L-G09RevD.01\State=2-A\HF=-308.0  
229091\S2=0.752954\S2-1=0.\S2A=0.750005\RMSD=8.406e-09\RMSF=2.276e-05\  
Dipole=1.2360158,0.1193871,0.1600538\Quadrupole=-2.4096797,1.6159749,0  
.7937048,-0.3725591,-0.4284369,-0.2385753\PG=CS [SG(C2H102),X(C2H8)]\@

**TScomb (†Bu)**

1\1\GINC-R49\FTS\UM11\6-31+G(d,p)\C8H18O4\ROOT\15-Dec-2015\0\#\ um11/6  
-31+g(d,p) opt=(ts,calcf, noeigen,maxcyc=200) scf=maxcyc=300 # freq=no  
raman guess=read geom=allcheck nosymm iop(1/8=1) int=ultrafine\TS for  
ROO-ORR symmetric O-O bond cleavage (R = t-Bu)\0,1\C,-0.1588981703,2  
.179741094,0.0122827659\o,-0.857432237,0.9210866005,-0.3226496189\o,-0  
.7178586741,0.5867597682,-1.5873567657\o,0.7177744807,-0.5867471173,-1  
.5874508283\o,0.8574260696,-0.9210900291,-0.3227522556\C,0.1589026089,  
-2.1797395729,0.0122137314\C,0.2766517845,-2.2296336301,1.5291194449\H  
, -0.1743530815, -3.1569332236,1.9066961853\H,1.3304797251,-2.2009722309  
,1.8374976759\H,-0.2494475427,-1.3742154371,1.9750621144\C,-0.27667236  
52,2.2296887517,1.5291842532\H,0.1743632508,3.1569830804,1.906737189\H  
, -1.3305064182,2.2010794116,1.8375462037\H,0.2493861908,1.3742664052,1  
.9751665596\C,-0.9215032102,3.3092166596,-0.6724550404\H,-0.4634836066  
,4.2761308972,-0.4231549503\H,-0.8888691641,3.1751136552,-1.7617106593  
\H,-1.9702308735,3.3203074104,-0.346336635\C,0.9215357505,-3.309228129  
8,-0.6724722086\H,0.4635137296,-4.2761389721,-0.4231624905\H,0.8889334  
989,-3.1751530237,-1.7617323352\H,1.9702537816,-3.3203057115,-0.346322  
3525\C,1.29243356741,2.1179337927,-0.4469537998\H,1.3490909086,1.980834  
972,-1.5332336404\H,1.7842365271,3.0638076461,-0.1802259853\H,1.821220  
8892,1.2892193716,0.0394286802\C,-1.2924271524,-2.1179781121,-0.447042  
4009\H,-1.7842367748,-3.0638100811,-0.180181033\H,-1.821205435,-1.2891  
922588,0.0392240533\H,-1.3490801643,-1.9810319863,-1.533341857\Versio  
n=ES64L-G09RevD.01\HF=-616.041898\S2=0.358445\S2-1=0.\S2A=0.003526\RMS  
D=9.222e-09\RMSF=1.117e-06\Dipole=0.0000193,0.0000157,0.9007243\Quadru  
pole=-3.0694386,6.9806711,-3.9112325,0.3514974,-0.0000042,0.0000821\PG  
=C01 [X(C8H18O4)]\@

**†Bu04†Bu**

1\1\GINC-R89\Fopt\RM11\6-31+G(d,p)\C8H18O2\ROOT\16-Jan-2016\0\#\ m11/6  
-31+g(d,p) int=ultrafine freq opt=maxcyc=200 scf=maxcyc=200\†Bu00†Bu\  
\o,1\C,1.7476345794,-0.0268819543,-0.008914061\C,2.1635570714,-1.13710  
10898,-0.9739105603\H,1.4646985287,-1.9804978104,-0.9144840228\H,2.168  
4589193,-0.7569994202,-2.0043556742\H,3.1720454668,-1.4949644362,-0.72  
29469035\C,1.6574555875,-0.5383856861,1.428374459\H,2.6379941816,-0.91  
16393147,1.7556451927\H,1.3475715738,0.2711214312,2.1041619111\H,0.930  
2186433,-1.3575090268,1.4974542193\C,2.6844550941,1.1745779674,-0.1103  
255713\H,2.710595037,1.553604839,-1.1404397172\H,2.3468525198,1.981476  
4649,0.554148931\H,3.7005167836,0.8786135138,0.1836967272\o,0.48112924  
23,0.5277163558,-0.4236642647\o,-0.4810380002,-0.5301641306,-0.4205970  
85\C,-1.7476211375,0.0269002138,-0.0094006013\C,-1.6577197673,0.546893  
0662,1.4248542775\H,-0.9304035796,1.3663292546,1.4892334802\H,-2.63828  
53444,0.9222026756,1.7496848966\H,-1.3480812568,-0.2586290316,2.105499  
725\C,-2.1633403908,1.1313949981,-0.9810313123\H,-1.4646240064,1.97522  
74902,-0.9263090825\H,-2.1678142755,0.7452502531,-2.0092289099\H,-3.17  
19716115,1.4905773234,-0.7325361771\C,-2.6844384963,-1.1751252144,-0.1  
038957115\H,-2.3468489635,-1.978159523,0.5652508675\H,-3.7005074285,-0  
.8774679474,0.1883869949\H,-2.7105489704,-1.5601132618,-1.1317970274\  
Version=ES64L-G09RevD.01\State=1-A\HF=-465.8214855\RMSD=4.447e-09\RMSF  
=3.241e-06\Dipole=-0.0000419,0.001064,0.3564264\Quadrupole=3.6196487,-  
1.8097103,-1.8099383,-0.1431987,0.0009595,-0.000035\PG=C01 [X(C8H18O2)]\@

**TS1a (†Bu)**

1\1\GINC-R538\FTS\UM11\6-31+G(d,p)\C8H18O4\ROOT\28-Aug-2015\0\#\ um11/  
6-31+G\*\* opt=(TS,calcf, noeigen,maxcyc=200) scf=maxcyc=200 # int=ultra  
fine freq=norman guess=mix nosymm\TS for single RO-OR bond cleavage  
(R = tert-butyl)\0,1\C,-2.7671959208,0.0039307524,0.0625705947\o,-1.4  
934831698,-0.5341935111,0.5222923095\o,-0.509132146,-0.339579513,-0.50

19938358\o,0.207062408,0.687252002,-0.2263382343\o,1.6778388569,0.0432  
519455,0.9254711519\c,2.7956629872,-0.0399031064,0.081449126\c,3.87572  
21373,-0.594947477,1.0376069774\h,4.8205403959,-0.6874942588,0.4844047  
293\h,4.0224045713,0.0850660656,1.8861087122\h,3.5826447108,-1.5826550  
978,1.415124337\c,-3.6686792263,-0.274229184,1.2629911973\h,-4.6883165  
023,0.0676744127,1.0402479864\h,-3.6958648299,-1.3496673162,1.48118522  
47\h,-3.3009927226,0.2579505034,2.1496438205\c,-3.2293106501,-0.761471  
9895,-1.1755492308\h,-4.2268957085,-0.4140009396,-1.4777531784\h,-2.54  
07800757,-0.5995879527,-2.0153682621\h,-3.2797839738,-1.8372105758,-0.  
9614477859\c,3.1970481353,1.3466303758,-0.4299749074\h,4.1203926573,1.  
2866788884,-1.0236466352\h,2.3999301511,1.7567560653,-1.0641576069\h,3  
.3593900449,2.0282196682,0.4154151751\c,-2.6440162673,1.5025984441,-0.  
2047538092\h,-2.0142589721,1.7024804795,-1.0820382335\h,-3.6413334757,  
1.920943926,-0.3991396206\h,-2.2055131122,2.0104822377,0.6640344714\c,  
2.5541960355,-1.022093995,-1.0696066102\h,3.4890561175,-1.2064518756,-  
1.6177965388\h,2.1755585916,-1.9752366885,-0.6767098811\h,1.8155239529  
, -0.6151112856, -1.7728984433\version=ES64L-G09RevD.01\HF=-616.01853\S  
2=0.697062\S2-1=0.\S2A=0.016434\RMSD=4.101e-09\RMSF=5.013e-07\Dipole=-  
0.4489541,0.0742425,-0.5588039\Quadrupole=8.4735549,-3.8331955,-4.6403  
594,-1.3137775,-0.4162822,0.0679746\PG=C01 [X(C8H18O4)]\@

### int-1 (tBu)

1\1\GINC-R2522\Fopt\UM11\6-31+G(d,p)\C8H18O4\ROOT\31-Aug-2015\0\#\ um1  
1/6-31+G\*\* opt=(maxcyc=200) scf=(maxcyc=200) # freq=noraman guess=mix  
nosymm\ROO\* + RO\* caged complex (R = tert-Butyl)\0,1\c,-3.045696955  
2,0.1505471965,0.089159753\o,-2.0893332691,0.4613618497,1.0431398844\o  
,-0.0202390083,-0.9554668324,0.0878059036\o,0.6365566645,0.0619268857,  
-0.2703305307\o,1.681957217,0.3464910494,0.6861489755\c,2.9585470667,-  
0.0258706195,0.0913143549\c,3.9354176438,0.3283643966,1.2100698512\h,4  
.9604144827,0.1112606781,0.8806366547\h,3.8621367911,1.3947993059,1.45  
93603852\h,3.7191421166,-0.2615143391,2.110002412\c,-4.2885250179,0.94  
11641155,0.5775527523\h,-5.1138744965,0.7499970173,-0.1217441278\h,-4.  
5806476728,0.6107484147,1.5818225193\h,-4.0751163143,2.017104956,0.597  
7502087\c,-3.3440060089,-1.3546726788,0.0983999737\h,-4.1547897438,-1.  
5898253801,-0.6058683244\h,-2.4467206054,-1.9132244818,-0.1988602819\h  
,-3.6391558775,-1.6735887442,1.1064057013\c,3.2097917134,0.815558696,-  
1.1583549753\h,4.2120429318,0.6017189284,-1.5545666626\h,2.4756040795,  
0.5864523945,-1.9418638687\h,3.1465184606,1.8844926332,-0.9157431941\c  
,-2.6207317772,0.6415229818,-1.3006315842\h,-1.7329345682,0.090388408,  
-1.637908282\h,-3.4275149046,0.4839182603,-2.0306527905\h,-2.376655192  
3,1.7113222642,-1.2613464005\c,2.9744409846,-1.5230991023,-0.210576528  
6\h,3.9841187286,-1.8247600856,-0.5214886008\h,2.6906692536,-2.0943654  
946,0.6830984601\h,2.2787572774,-1.7743876735,-1.0225996379\version=E  
S64L-G09RevD.01\HF=-616.020827\S2=0.992261\S2-1=0.\S2A=0.045424\RMSD=4  
.547e-09\RMSF=7.203e-06\Dipole=0.5449906,-0.1132354,-0.7834099\Quadrup  
ole=10.039847,-4.263394,-5.776453,-0.7882763,0.9459766,-0.5310536\PG=C  
01 [X(C8H18O4)]\@

### TS2 (tBu)

1\1\GINC-R39\FTS\UM11\6-31+G(d,p)\C8H18O4\ROOT\14-Dec-2015\0\#\ um11/6  
-31+G\*\* opt=(TS,calcfc,oeigen,maxcyc=200) scf=maxcyc=200 # int=ultraf  
ine freq=noraman guess=read geom=allcheck nosymm\TS for second RO--o  
bond cleavage (R = tert-butyl)\0,1\c,-2.5115032022,-0.2725031407,0.01  
0592102\o,-1.3984183954,-0.7527855622,0.682233243\o,0.2036618822,2.402  
9816557,-0.2057437026\o,0.4834696615,1.2778595805,0.1286059396\o,2.199  
9792372,1.0101254549,-0.1488944418\c,2.4102517288,-0.3842109277,0.0151  
378886\c,3.9273168555,-0.5075569712,-0.2114906032\h,4.2162825539,-1.56  
27999413,-0.1098208108\h,4.1961470328,-0.1597098172,-1.2171715799\h,4.  
4761810773,0.0857058694,0.5309018496\c,-3.5512797247,-1.4086077537,0.2  
128049969\h,-4.480064468,-1.1124551282,-0.2931058157\h,-3.1849712718,-  
2.3459851398,-0.2232348713\h,-3.7522574776,-1.5575302781,1.2806044659\  
c,-2.2117293963,-0.094754671,-1.4841791255\h,-3.1158655065,0.222312318  
5,-2.0223067176\h,-1.4379029028,0.6715243303,-1.6308242073\h,-1.854424  
6187,-1.0403844595,-1.9135724991\c,1.6365700625,-1.1735848236,-1.04444  
40131\h,1.9127251675,-2.2367456109,-1.0023716849\h,0.5555210012,-1.096  
8826282,-0.8643714342\h,1.8685265671,-0.7857232024,-2.0457761711\c,-3.  
016896272,1.0239151528,0.6566620629\h,-2.2670522407,1.8190636836,0.551  
2398705\h,-3.9446818632,1.3576447911,0.1712445426\h,-3.2091248786,0.86  
15733857,1.7250177953\c,2.0360829013,-0.8249896762,1.4331102232\h,2.32  
26436382,-1.8746714531,1.5886678015\h,2.5596600187,-0.2017053064,2.170  
4898361\h,0.9528418331,-0.7408747309,1.5930060604\version=ES64L-G09Re  
vD.01\HF=-616.0138781\S2=1.374221\S2-1=0.\S2A=2.22189\RMSD=6.212e-09\  
RMSF=1.459e-06\Dipole=-0.730872,-0.7089713,-0.2255081\Quadrupole=5.9321  
507,-3.8847048,-2.0474459,-2.9461813,1.1871333,1.0157919\PG=C01 [X(C8H  
18O4)]\@

### int-2 (tBu)

```
1\1\GINC-R53\Fopt\UM11\6-31+G(d,p)\C8H18O4\ROOT\09-Dec-2015\0\#\# um11/6-31+G** opt=(maxcyc=200) scf=(maxcyc=200) # freq=noraman guess=read geom=allcheck nosymm int=ultrafine\RO* + 302 + RO* caged complex (R = tert-Butyl)\0,1\C,-2.5487888788,-0.2648873853,-0.0269345331\O,-1.3841367084,-0.3319154907,0.719949852\O,-0.2099069724,2.2001823708,-0.0287982355\O,0.4745868652,1.9727642394,0.925395721\O,2.8930624597,1.0200242616,0.1685576611\C,2.6266261764,-0.3349520964,0.0413457876\C,4.0203848002,-0.9264876167,-0.3003580516\H,3.9096004686,-2.0123223624,-0.423934019\H,4.4025740432,-0.494518565,-1.2336032096\H,4.7306128919,-0.724611897,0.5107500547\C,-3.2671133083,-1.5948173698,0.3305416345\H,-4.2120513998,-1.63127705,-0.2280888165\H,-2.6464321548,-2.4535062632,0.046997306\H,-3.4796610271,-1.6380788671,1.4055494045\C,-2.2306205506,-0.2242357088,-1.5274468371\H,-3.1569839484,-0.2233058103,-2.1186790638\H,-1.6641593421,0.6860242712,-1.768969412\H,-1.6261979723,-1.0966181954,-1.8101554022\C,1.6408987762,-0.5967728031,-1.1040908613\H,1.5129776276,-1.6774129812,-1.2629590964\H,0.6580758778,-0.1752560621,-0.8549220597\H,2.008316938,-0.1371664042,-2.0312984004\C,-3.4055472008,0.9295961504,0.4133635963\H,-2.8843469222,1.8707408209,0.1925046048\H,-4.3658964163,0.9312092028,-0.1209322022\H,-3.5952346822,0.879023575,1.49323198\C,2.1179077507,-0.9128193393,1.3690898737\H,2.0052542247,-2.003488894,1.2900441271\H,2.8252400818,-0.6812069709,2.1761028288\H,1.1366175026,-0.4852507593,1.6149757683\Version=ES64L-G09RevD.01\HF=-616.0289831\S2=1.999392\S2-1=0.\S2A=4.0984\RMSD=3.660e-09\RMSF=7.383e-06\Dipole=-0.9828954,-0.9042866,-0.4469414\Quadrupole=3.9570415,-1.8892496,-2.0677919,-3.7814786,0.0150096,0.0428362\PG=C01 [X(C8H18O4)]\@
```

### int-2\* (tBu, triplet)

```
1\1\GINC-R50\Fopt\UM11\6-31+G(d,p)\C8H18O4(3)\ROOT\09-Dec-2015\0\#\# um11/6-31+G** opt=(maxcyc=200) scf=(maxcyc=200) # freq=noraman guess=read geom=allcheck nosymm int=ultrafine\RO* + 302 + RO* caged complex (R = tert-Butyl)\0,3\C,-2.5440956482,-0.2628818956,-0.0264304865\O,-1.3716808841,-0.351693284,0.7060244072\O,-0.1881110358,2.1807319136,-0.1130543382\O,0.3987662244,1.9076670489,0.8931439471\O,2.8471811844,1.0239385064,0.1872303948\C,2.6184049259,-0.3365853868,0.046360693\C,4.0321012377,-0.8882564853,-0.2800064588\H,3.9524527388,-1.9758845194,-0.4114332312\H,4.4148776767,-0.4404110685,-1.2055164238\H,4.725715632,-0.672204639,0.5417498036\C,-3.2795428966,-1.5815950495,0.3387233822\H,-4.2323532252,-1.6012054858,-0.2072529098\H,-2.6772685025,-2.4499466269,0.0450617329\H,-3.4778093772,-1.6233287813,1.4164768972\C,-2.2479114081,-0.223588451,-1.5313010099\H,-3.1826851224,-0.2088406048,-2.1089876856\H,-1.6722862051,0.6786935002,-1.7802816142\H,-1.6603576915,-1.1040973883,-1.8242831395\C,1.6556271583,-0.6171373619,-1.1141086116\H,1.5667930867,-1.6993844988,-1.2877502587\H,0.6560340189,-0.2320157209,-0.8724064713\H,2.018819388,-0.134110092,-2.0310470703\C,-3.3748090579,0.9439228041,0.4305289412\H,-2.8421376371,1.8774557912,0.2047841007\H,-4.342451687,0.9624711804,-0.0900590535\H,-3.5495794758,0.892467571,1.5128357317\C,2.1074366894,-0.9367932239,1.3633655501\H,2.0245869293,-2.029460177,1.2751069747\H,2.7978653594,-0.6928586383,2.1813022816\H,1.1120766045,-0.5364159367,1.5984519246\Version=ES64L-G09RevD.01\HF=-616.029296\S2=3.000495\S2-1=0.\S2A=2.022791\RMSD=8.615e-09\RMSF=5.404e-06\Dipole=-0.9714731,-0.8897303,-0.4386078\Quadrupole=4.2131716,-2.0325714,-2.1806001,-3.7392723,-0.0505321,0.0450699\PG=C01 [X(C8H18O4)]\@
```

===Complexation===

### sec-tetroxide-ether complex

```
E(M11/6-311+G**//M11/6-31+G*) = -771.1844763810  
1\1\GINC-R140\Fopt\RM11\6-31+G(d,p)\C10H24O5\ROOT\16-Feb-2016\0\#\# m11/6-31+G** opt=maxcyc=200 scf=maxcyc=200 freq int=ultrafine\ROOOOR'(H) --OMe2 complex (R = sec-Bu)\0,1\H,-1.9662974119,1.8933550227,-1.2354881811\C,-2.3878034051,1.9966507923,-0.2221886186\O,-1.2982039996,2.3699901037,0.6579802158\O,-0.2295199856,1.4916227272,0.4478882486\O,0.4472770835,1.9293760153,-0.703248207\O,1.2496197245,3.0167541697,-0.3277021069\C,2.4710114518,2.5085622194,0.2537343336\H,2.1831137957,1.7830127547,1.0336174253\C,3.1241758215,3.727274194,0.8869570575\H,4.0326327976,3.4338988777,1.4278471075\H,3.3970094359,4.4581984304,0.1129958673\H,2.4344506031,4.2039819569,1.5936393529\C,-3.343087393,3.177652227,-0.1497958822\H,-4.1939790459,3.0165969581,-0.8237256585\H,-3.7261195456,3.2959612514,0.8735279471\H,-2.8333224555,4.1032263051,-0.4436876308\C,-2.9990215354,0.6707054418,0.2185341896\H,-2.1799841235,-0.052124071,0.3331914778\H,-3.4669284365,0.8076999158,1.2064325986\C,3.3259786438,1.8325318313,-0.816604554\H,2.7050762277,1.0828770545,-1.3291349285\H,3.6025416219,2.5889162577,-1.5675171025\C,-4.0064253105,0.1348132413,-0.7998561662\H,-4.3875678526,-0.8484101778,-0.494487723\H,-4.872064411,0.8027809471,-0.9132863428\H,-3.522480413,0.0155074241,-1.7796431503\C,4.5749189396,1.1641243447,-0.237782189\H,5.1172921092,0.607781287
```

, -1.0128507866\H, 5.2707950555, 1.900328625, 0.1870924867\H, 4.3091720468, 0.4535863799, 0.558920276\O, -0.8896542061, -0.3278942916, -1.930631621\C, -0.3641496197, 0.1694152963, -3.141824182\H, 0.5561389703, 0.7522192119, -2.9598623136\H, -1.1215635548, 0.8257687348, -3.588500542\H, -0.1388451086, -0.6540559069, -3.8434641088\C, 0.0354834188, -1.1453043678, -1.2487032273\H, 0.9576906912, -0.5828644138, -1.0161517975\H, 0.2957932794, -2.0345108213, -1.8508967557\H, -0.4303862758, -1.4670059484, -0.3093248082\Version=ES64L-G09RevD.01\State=1-A\HF=-771.0040293\RMSD=4.608e-09\RMSF=5.859e-06\Dipole=0.6626081, -0.422175, -0.3488615\Quadrupole=4.290292, -2.6508009, -1.6394911, -0.9339771, 1.1528536, 0.0433351\PG=C01 [X(C10H24O5)]\@

**tert-tetroxide-ether complex**

E(M11/6-311+G\*\*//M11/6-31+G\*) = -771.1940559920  
1\1\GINC-R89\FOpt\RM11\6-31+G(d,p)\C10H24O5\ROOT\16-Feb-2016\O\# m11/6-31+G\*\* opt=maxcyc=200 scf=maxcyc=200 freq int=ultrafine\ROOOR'(H)- --Ome2 complex (R = tert-Bu)\0,1\C, 0.0361927149, 3.6612406371, 0.8551418866\O, 0.444354072, 2.3534322163, 1.3503426617\O, -0.485351851, 1.3835909269, 0.9559294572\O, 0.0132960083, 0.7728631833, -0.2121292272\O, 0.9497842081, -0.1835973371, 0.1931146098\C, 0.3299673438, -1.5055731851, 0.2380522435\C, 1.4581370885, -2.3577291807, 0.8120135037\H, 1.133480073, -3.4052831473, 0.86947048\H, 2.3470119972, -2.2999114675, 0.1698068386\H, 1.726769459, -2.0124791267, 1.8188598224\C, 1.1670468159, 4.5557201333, 1.3545927795\H, 0.9631659217, 5.5981755035, 1.0755544982\H, 1.2503198823, 4.4925826181, 2.4474630429\H, 2.1226210776, 4.2491061892, 0.9098480051\C, -1.3021572113, 4.0408955982, 1.4848460947\H, -1.592742171, 5.0525684672, 1.1693777989\H, -2.0884441542, 3.3415401584, 1.1700530652\H, -1.2283656102, 4.0192403064, 2.5802661035\C, -0.0400492271, -1.9322973291, -1.1795705762\H, -0.3944759353, -2.9727446116, -1.1750489173\H, -0.8507292405, -1.3015294515, -1.5666102978\H, 0.8364712779, -1.8612061852, -1.8380708437\C, -0.0415112823, 3.659077401,

## Appendix S6. References

1. Raley, J. H.; Porter, L. M.; Rust, F. F.; Vaughan, W. E., *J. Am. Chem. Soc.* **1951**, *73*, 15-17.
2. Russell, G. A., *J. Am. Chem. Soc.* **1957**, *79*, 3871-3877.
3. (a) Weaver, J.; Meagher, J.; Shortridge, R.; Heicklen, J., *J. Photochem.* **1975**, *4*, 341-360; (b) Niki, H.; Maker, P. D.; Savage, C. M.; Breitenbach, L. P., *J. Phys. Chem.* **1981**, *85*, 877-881; (c) Kan, C. S.; Calvert, J. G.; Shaw, J. H., *J. Phys. Chem.* **1980**, *84*, 3411-3417.
4. (a) Niki, H.; Maker, P. D.; Savage, C. M.; Breitenbach, L. P., *J. Phys. Chem.* **1982**, *86*, 3825-3829; (b) Noell, A. C.; Alconcel, L. S.; Robichaud, D. J.; Okumura, M.; Sander, S. P., *J. Phys. Chem.* **2010**, *114*, 6983-6995; (c) Wallington, T. J.; Gierczak, C. A.; Ball, J. C.; Japar, S. M., *Int. J. Chem. Kinet.* **1989**, *21*, 1077-1089; (d) Atkinson, D. B.; Hudgens, J. W., *J. Phys. Chem. A* **1997**, *101*, 3901-3909.
5. (a) Henon, E.; Bohr, F.; Chakir, A.; Brion, J., *Chem. Phys. Lett.* **1997**, *264*, 557-564; (b) Feria, L.; Gonzalez, C.; Castro, M., *Int. J. Chem. Kinet.* **2004**, *96*, 380-393.
6. Ghigo, G.; Maranzana, A.; Tonachini, G., *J. Chem. Phys.* **2003**, *118*, 10575-10583.
7. Liang, Y.-N.; Li, J.; Wang, Q.-D.; Wang, F.; Li, X.-Y., *J. Phys. Chem. A* **2011**, *115*, 13534-13541.
8. Zhang, P.; Wang, W.; Zhang, T.; Chen, L.; Du, Y.; Li, C.; Lü, J., *J. Phys. Chem. A* **2012**, *116*, 4610-4620.
9. Feria, L.; Gonzalez, C.; Castro, M., *Int. J. Quantum Chem.* **2004**, *99*, 605-615.
10. Bennett, J. E.; Brown, D. M.; Mile, B., *Chem. Commun.* **1969**, 504-505.
11. Adamic, K.; Howard, J. A.; Ingold, K. U., *Chem. Commun.* **1969**, 505-506.
12. Nangia, P. S.; Benson, S. W., *Int. J. Chem. Kinet.* **1980**, *12*, 29-42.
13. Johnson, E. R.; Keinan, S.; Mori-Sanchez, P.; Contreras-Garcia, J.; Cohen, A. J.; Yang, W., *J. Am. Chem. Soc.* **2010**, *132*, 6498-6506.
14. Humphrey, W.; Dalke, A.; Schulten, K., *J. Molec. Graphics* **1996**, *14*, 33-38.
15. Contreras-Garcia, J.; Johnson, E. R.; Keinan, S.; Chaudret, R.; Piquemal, J.-P.; Beratan, D. N.; W., Y., *J. Chem. Theory Comput.* **2011**, *7*, 625-632.
16. de Silva, P.; Corminboeuf, C., *J. Chem. Theory Comput.*, **2014**, *10*, 3745-3756.
17. Kohout, M. *DGrid*, 4.6; Radebeul, 2011.
18. Te Velde, G.; Bickelhaupt, F. M.; Baerends, E. J.; Fonseca Guerra, C.; Van Gisbergen, S. J. A.; Snijders, J. G.; Ziegler, T., *Journal of Computational Chemistry* **2001**, *22*, 931-967.
19. Steinmann, S.; Corminboeuf, C., *J. Chem. Theory Comput.* **2011**, *7*, 3567-3577.
20. Frisch, M. J.; Trucks, G. W.; Schlegel, H. B.; Scuseria, G. E.; Robb, M. A.; Cheeseman, J. R.; Scalmani, G.; Barone, V.; Mennucci, B.; Petersson, G. A.; Nakatsuji, H.; Caricato, M.; Li, X.; Hratchian, H. P.; Izmaylov, A. F.; Bloino, J.; Zheng, G.; Sonnenberg, J. L.; Hada, M.; Ehara, M.; Toyota, K.; Fukuda, R.; Hasegawa, J.; Ishida, M.; Nakajima, T.; Honda, Y.; Kitao, O.; Nakai, H.; Vreven, T.; Montgomery, J., J. A.; Peralta, J. E.; Ogliaro, F.; Bearpark, M.; Heyd, J. J.; Brothers, E.; Kudin, K. N.; Staroverov, V. N.; Kobayashi, R.; Normand, J.; Raghavachari, K.; Rendell, A.; Burant, J. C.; Iyengar, S. S.; Tomasi, J.; Cossi, M.; Rega, N.; Millam, J. M.; Klene, M.; Knox, J. E.; Cross, J. B.; Bakken, V.; Adamo, C.; Jaramillo, J.; Gomperts, R.; Stratmann, R. E.; Yazyev, O.; Austin, A. J.; Cammi, R.; Pomelli, C.; Ochterski, J. W.; Martin, R. L.; Morokuma, K.; Zakrzewski, V. G.; Voth, G. A.; Salvador, P.; Dannenberg, J. J.; Dapprich, S.; Daniels, A. D.; Farkas, Ö.; Foresman, J. B.; Ortiz, J. V.; Cioslowski, J.; Fox, D. J. *Gaussian 09*, Revision D.01; Gaussian Inc.: Wallingford CT, 2013.
21. Peverati, R.; Truhlar, D. G., *J. Phys. Chem. Lett.* **2011**, *2*, 2810-2817.
22. (a) Ditchfield, R.; Hehre, W. J.; Pople, J. A., *J. Chem. Phys.* **1971**, *54*, 724-728; (b) Hehre, W. J.; Ditchfield, R.; Pople, J. A., *J. Chem. Phys.* **1972**, *56*, 2257-2261; (c) Hariharan, P. C.; Pople, J. A., *Theor. Chem. Acc.* **1973**, *28*, 213-222.
23. Bach, R. D.; Philippe, Y. A.; Schlegel, H. B., *J. Am. Chem. Soc.* **1996**, *118*, 12758-12765.
24. Dunning Jr., T. H., *J. Chem. Phys.* **1989**, *90*, 1007-1023.
25. Rienstra-Kiracofe, J. C.; Allen, W. D.; Schaefer III, H. F., *J. Phys. Chem. A* **2000**, *104*, 9823-9840.
26. (a) Ribeiro, R. F.; Marenich, A. V.; Cramer, C. J.; Truhlar, D. G., *J. Phys. Chem. B* **2011**, *115*, 14556-14562; (b) Zhao, Y.; Truhlar, D. G., *Phys. Chem. Chem. Phys.* **2008**, *10*, 2813-2818.

27. (a) Bach, R. D.; Dmitrenko, O.; Estévez, C. M., *J. Am. Chem. Soc.* **2003**, *125*, 16204–16205; (b) Bach, R. D.; Dmitrenko, O.; Estévez, C. M., *J. Am. Chem. Soc.* **2005**, *127*, 3140-3155.
28. Chen, W.; Schlegel, H. B., *J. Chem. Phys.* **1994**, *101*, 5957-5968.
29. Chuang, Y.-Y.; Coitiño, E.L.; Truhlar, D. G., *J. Phys. Chem. A* **2000**, *104*, 446-450.
